# Supplementary material
Source: publisher figshare collection journal article supplement (https://acs.figshare.com/ndownloader/files/4645621)
Supplement: Supplementary file 1 [file 4645621]

# Morpholine-Based Immonium and Halogenoamidinium Salts as Coupling Reagents in Peptide Synthesis

Ayman El-Faham,<sup>a,b,\*</sup> Fernando Albericio,<sup>a,c,d\*</sup>

<sup>a</sup>*Institute for Research in Biomedicine, Barcelona Science Park, Josep Samitier 1,  
08028-Barcelona, Spain*

<sup>b</sup>*Department of Chemistry, Faculty of Science, Alexandria University, Ibrahimia 21321,  
Alexandria, Egypt*

<sup>c</sup>*Department of Organic Chemistry, University of Barcelona, Martí i Franqués 1-11,  
08028-Barcelona, Spain*

<sup>d</sup>*CIBER-BBN, Networking Centre on Bioengineering, Biomaterials and Nanomedicine,  
Barcelona Science Park, Josep Samitier 1-5, E-08028 Barcelona, Spain*

## Supporting Information

Content:

General Procedures .....Pag 2

Copies of <sup>1</sup>H- and <sup>13</sup>C-NMR Spectra of Compounds 3ii, 4i, 5c, 5d, 5e, 5f, 5g, 6a,  
6b, and 7.....Pag 3-22

X-ray Tables .....Pag 23-36

## General Procedures

TLC was performed on silica plates (8×4 cm) using suitable solvent systems and visualization by a Spectroline UV Lamp Model CM-10 (254 nm). Melting points were obtained in open capillary tubes and were uncorrected. Infrared spectra (IR) were recorded on a FT-IR instrument as KBr pellets. The absorption bands ( $\nu_{\text{max}}$ ) were given in wave numbers ( $\text{cm}^{-1}$ ). NMR spectra were recorded on a 400 MHz spectrometer at room temperature. Tetramethylsilane (TMS) was used as reference for all NMR spectra with chemical shifts reported as ppm relative to TMS. HPLC analyses were carried out using Column C18, 5 $\mu$ , 4.6x150mm with dual  $\lambda$  absorbance detector.

HPLC-MS analyses were carried out using Column C18, 5 $\mu$ , 4.6x150mm with dual  $\lambda$  absorbance detector. All solvents used for recrystallization, extraction, column chromatography and TLC were of commercial grade, distilled before use and stored under dry conditions.

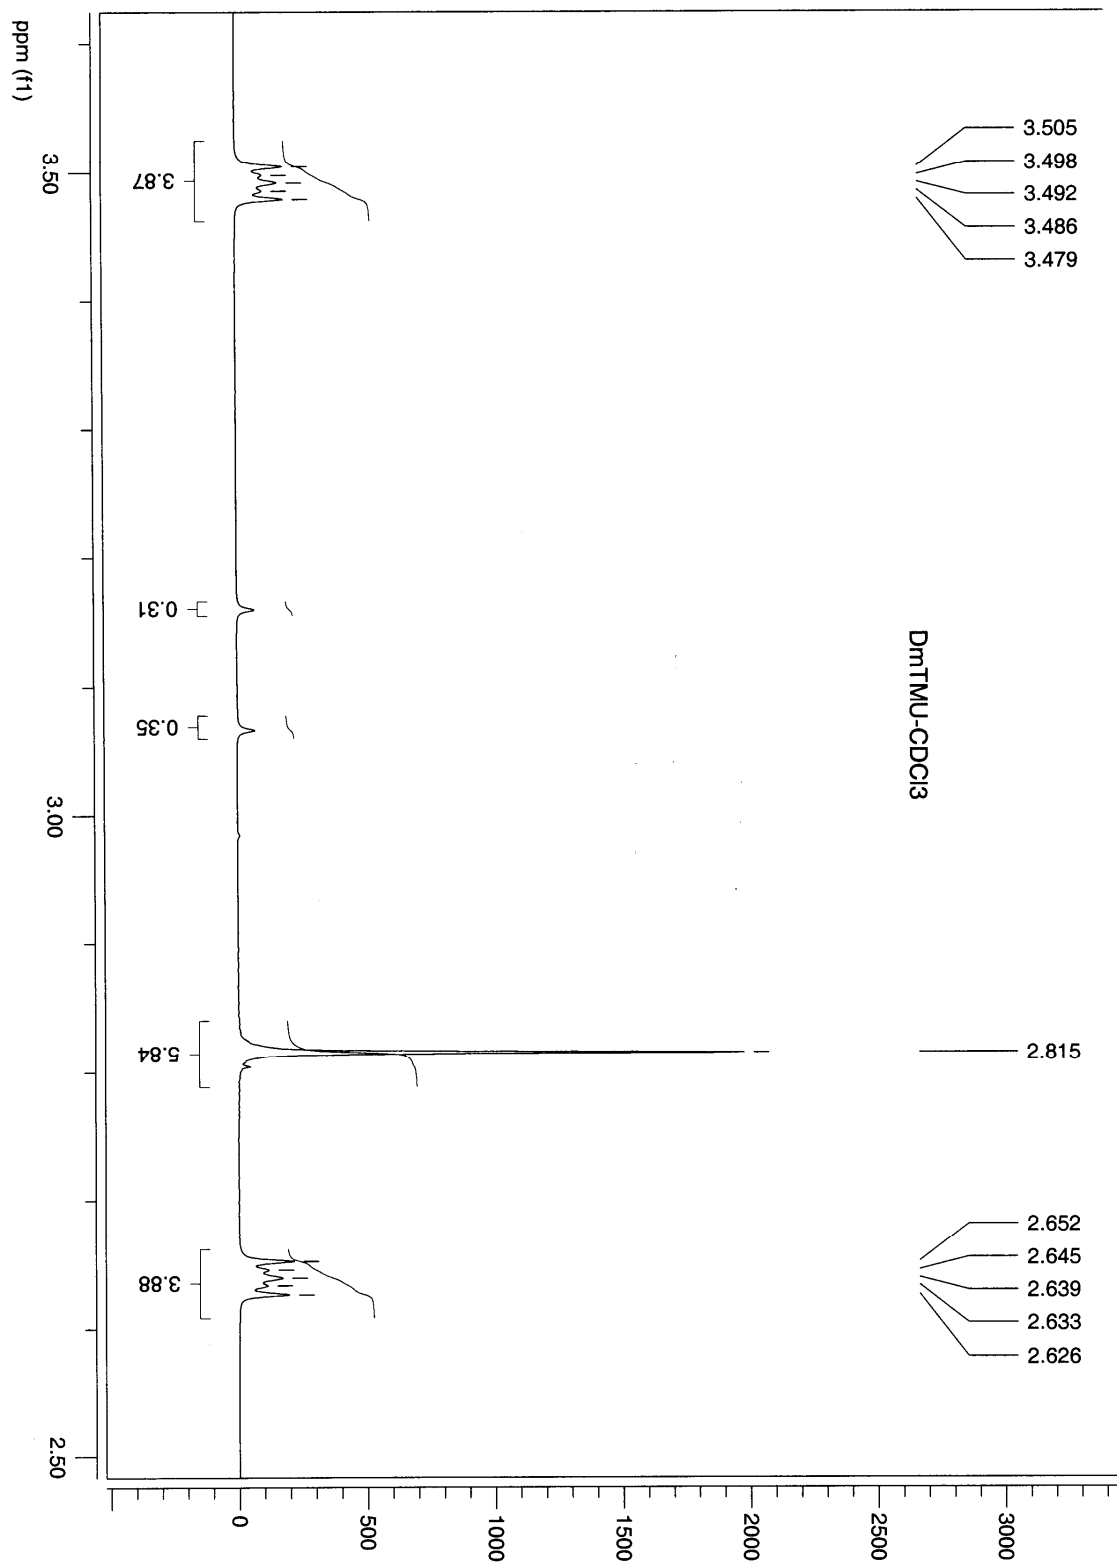

3 ii, H-NMR

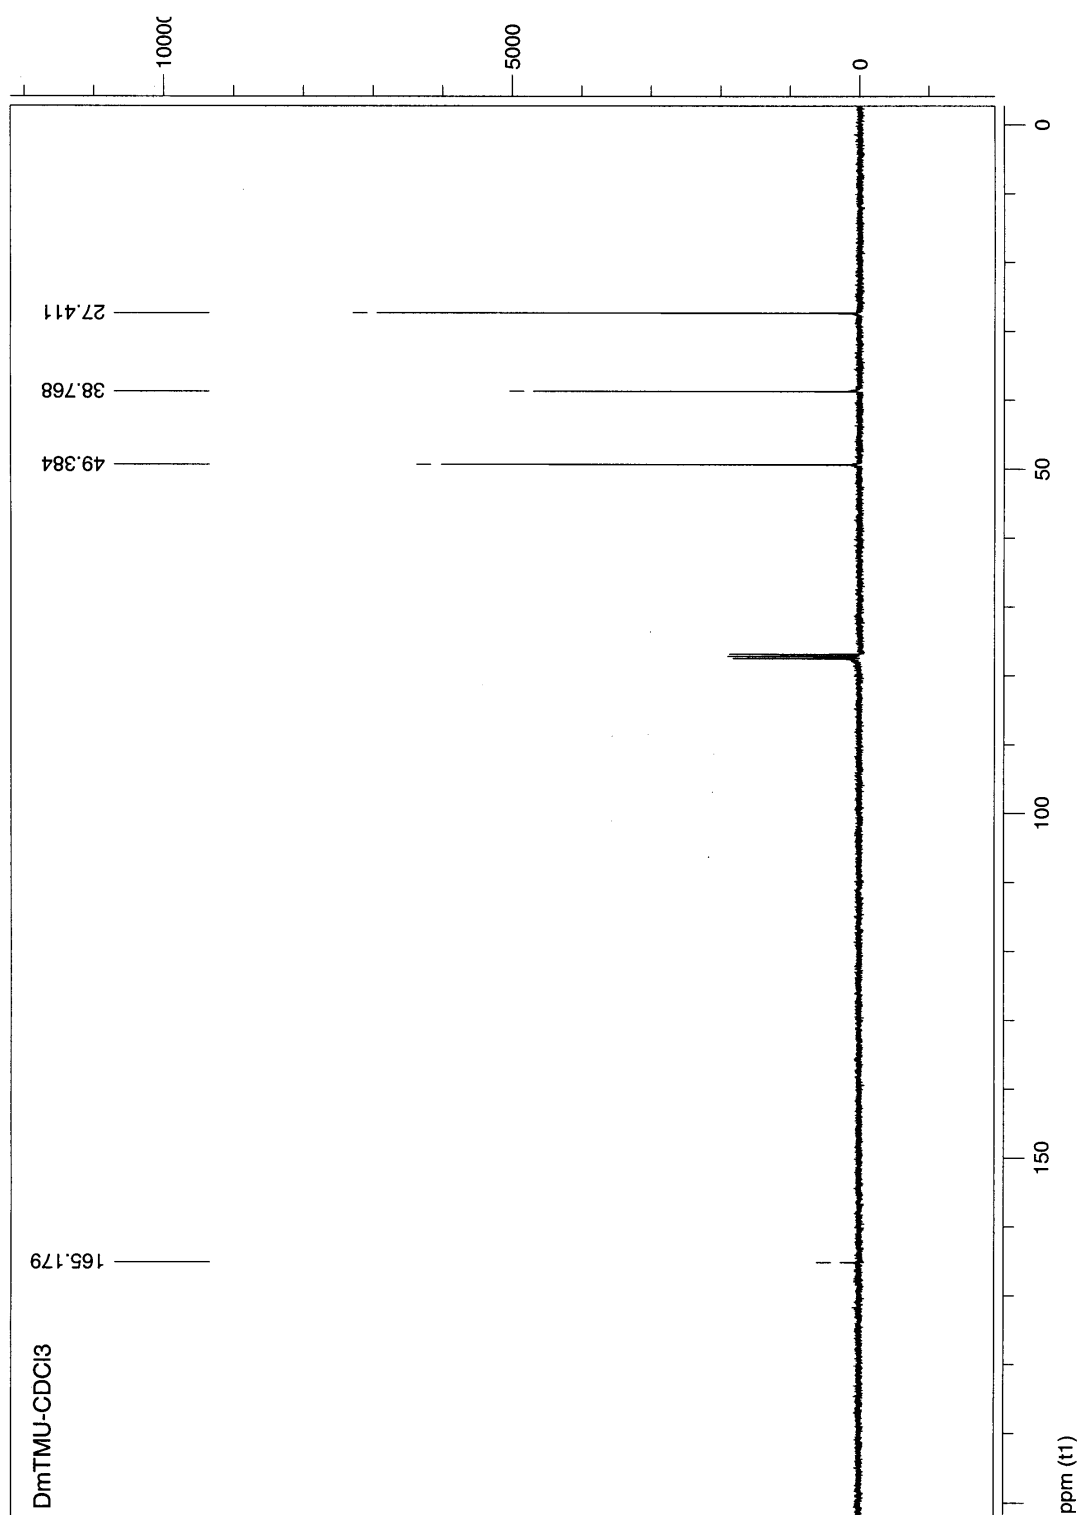

3ii, C-NMR



4i, C-NMR

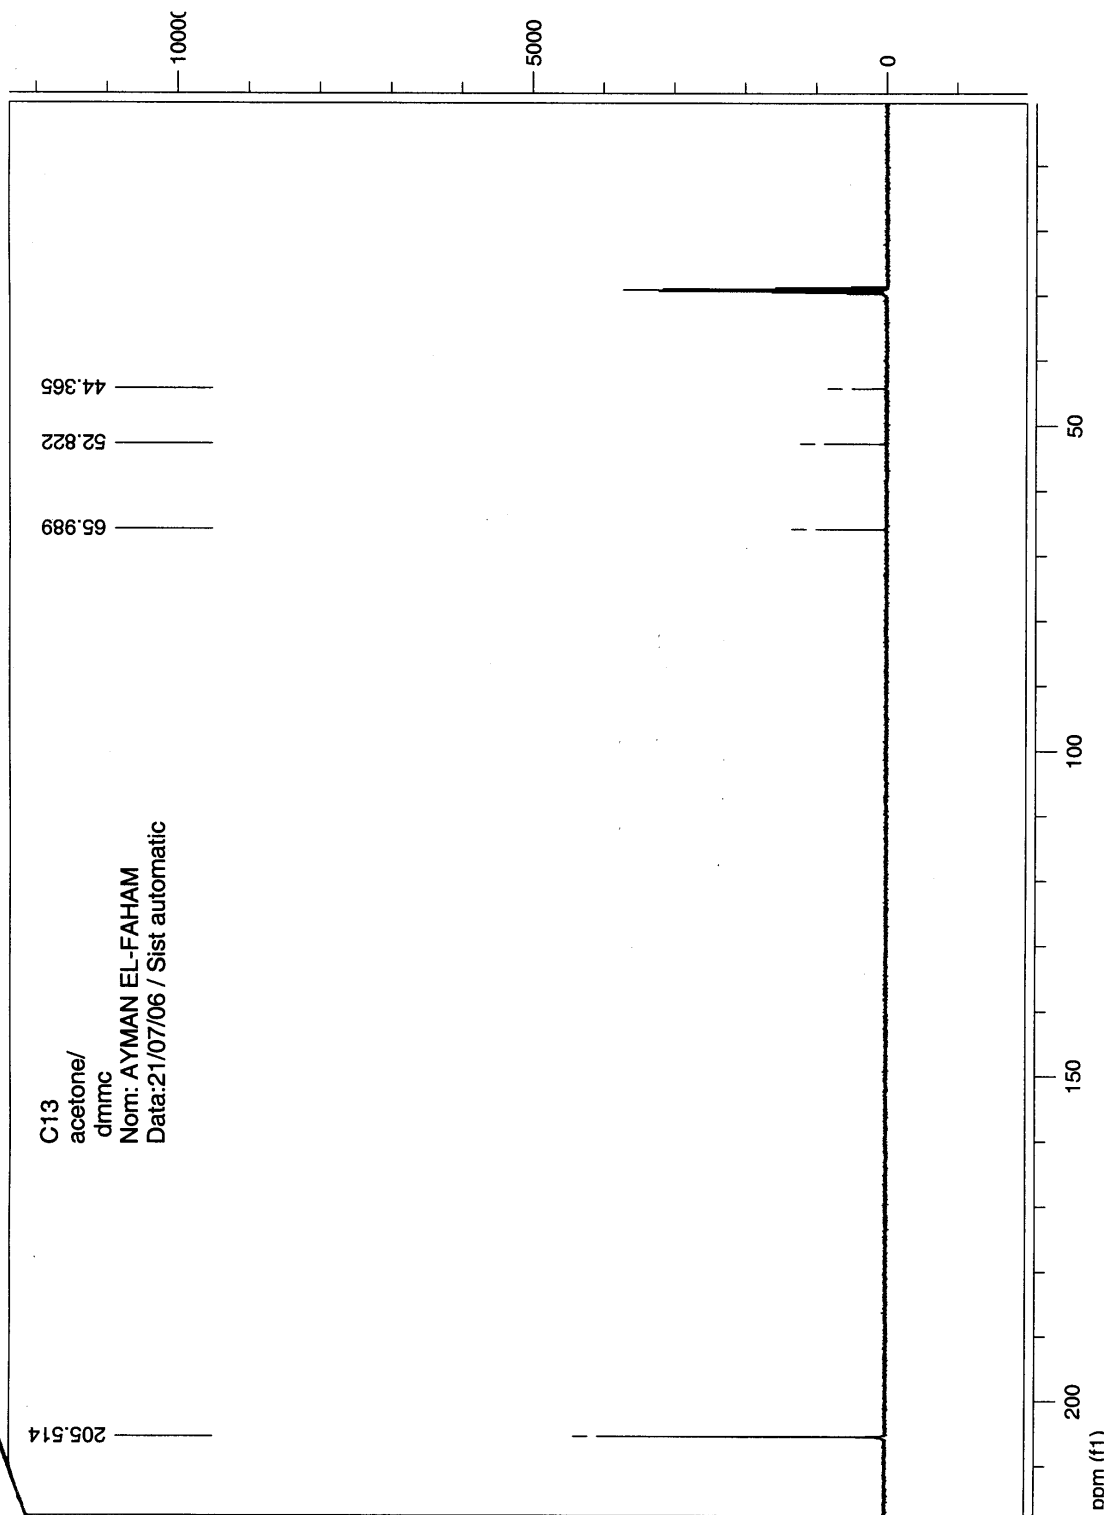

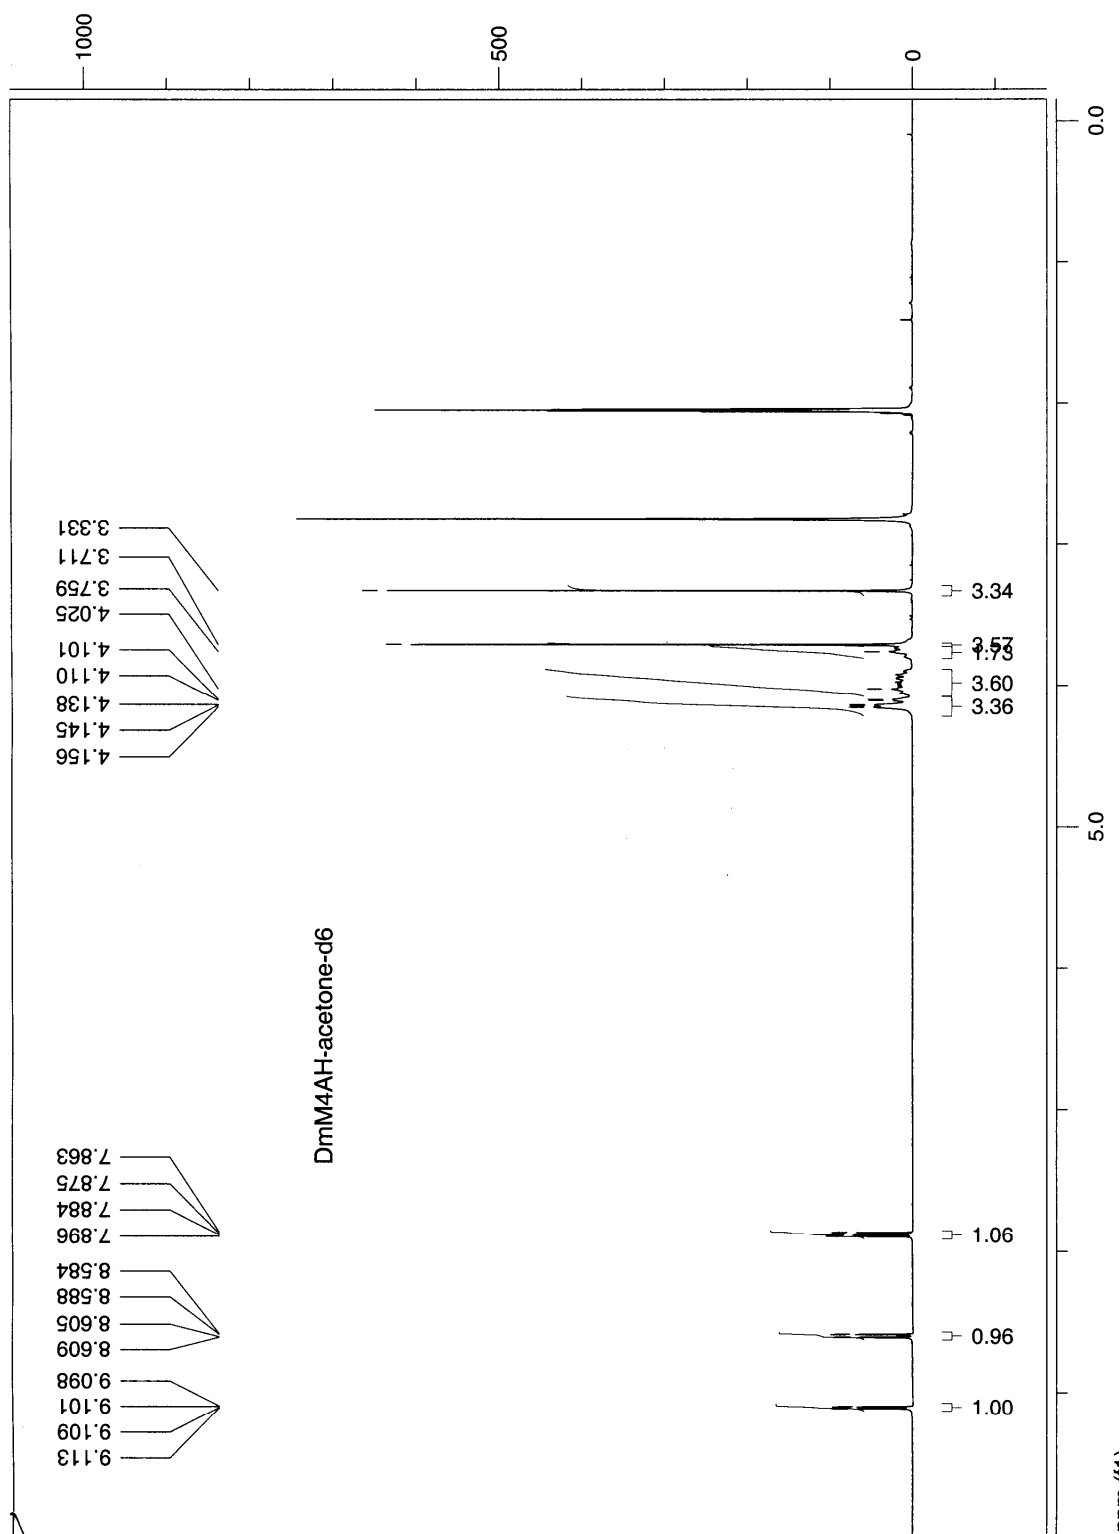

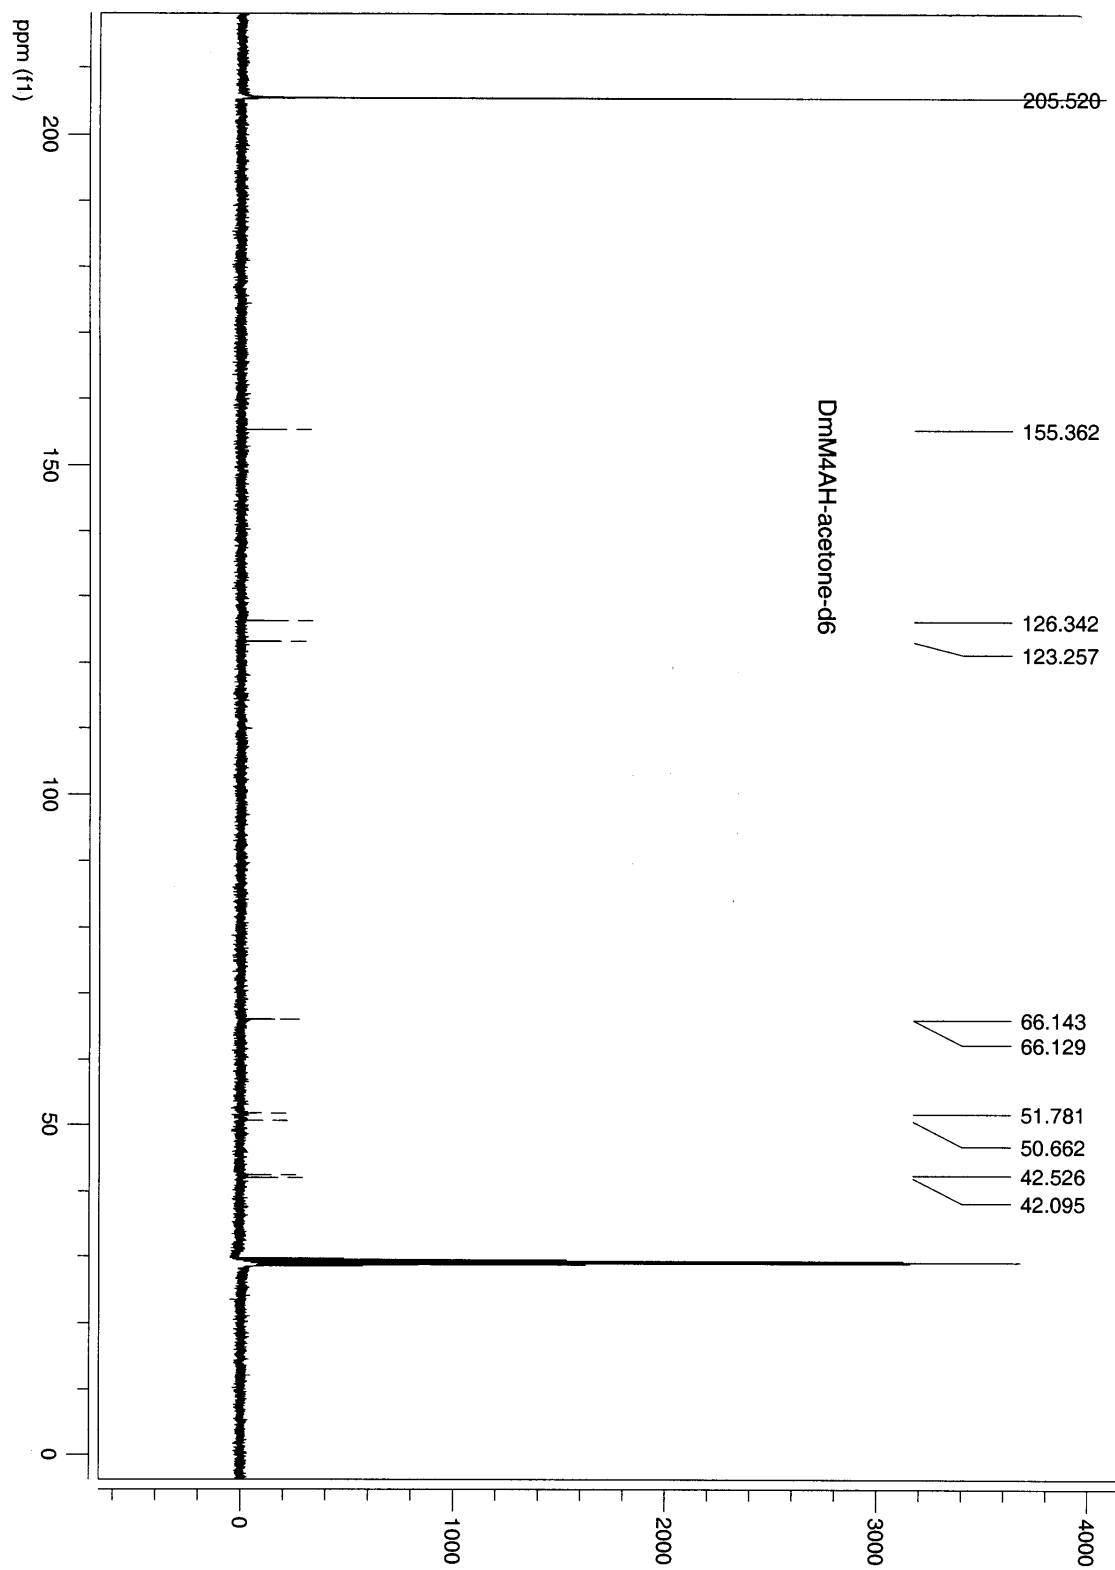

**5c, C-NMR**



# 5d. H-NMR

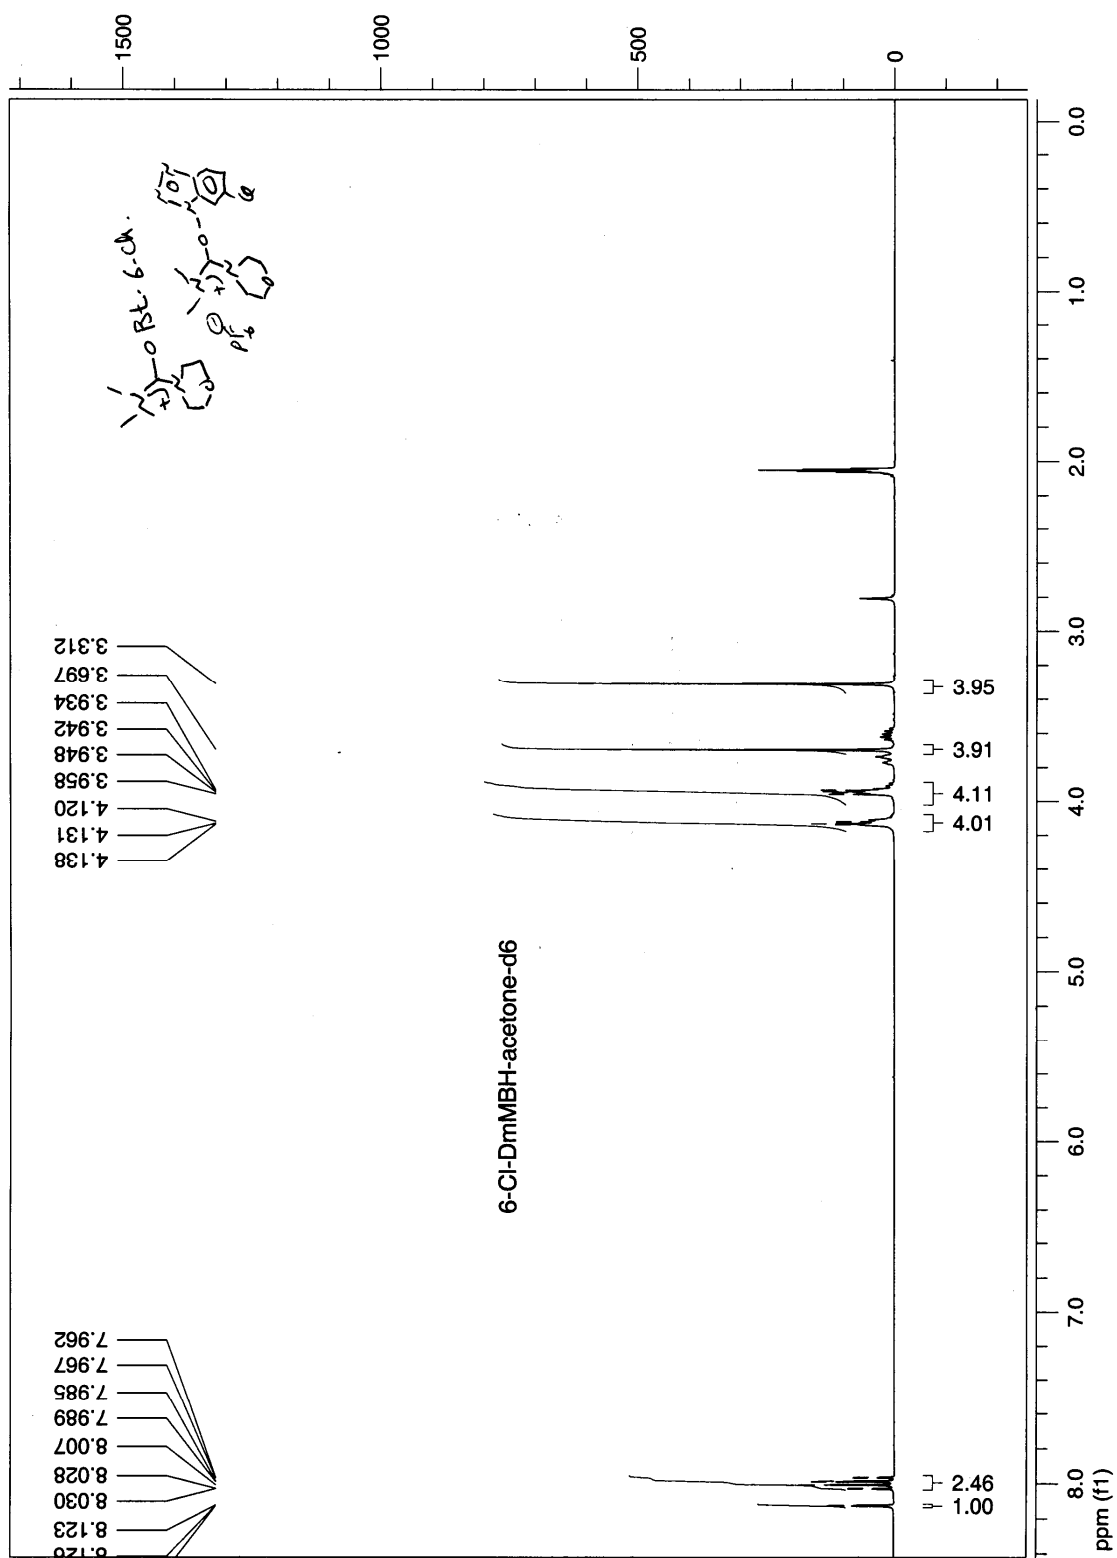

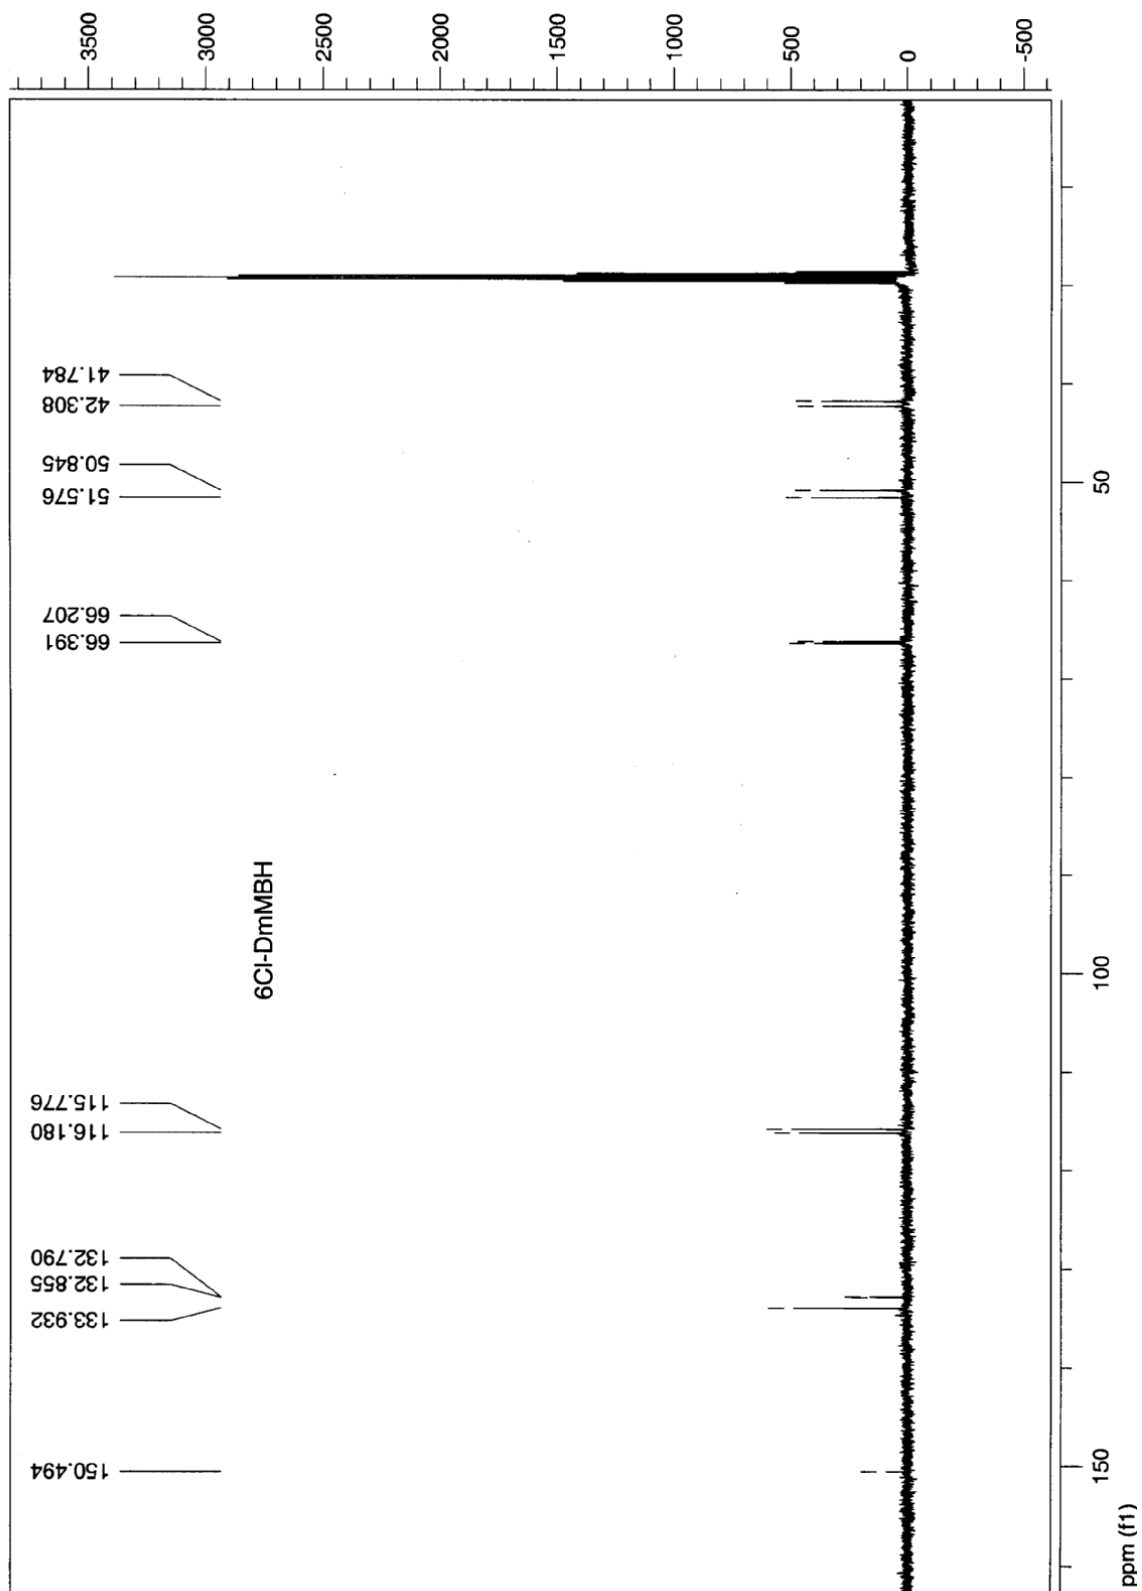

5d, C-NMR

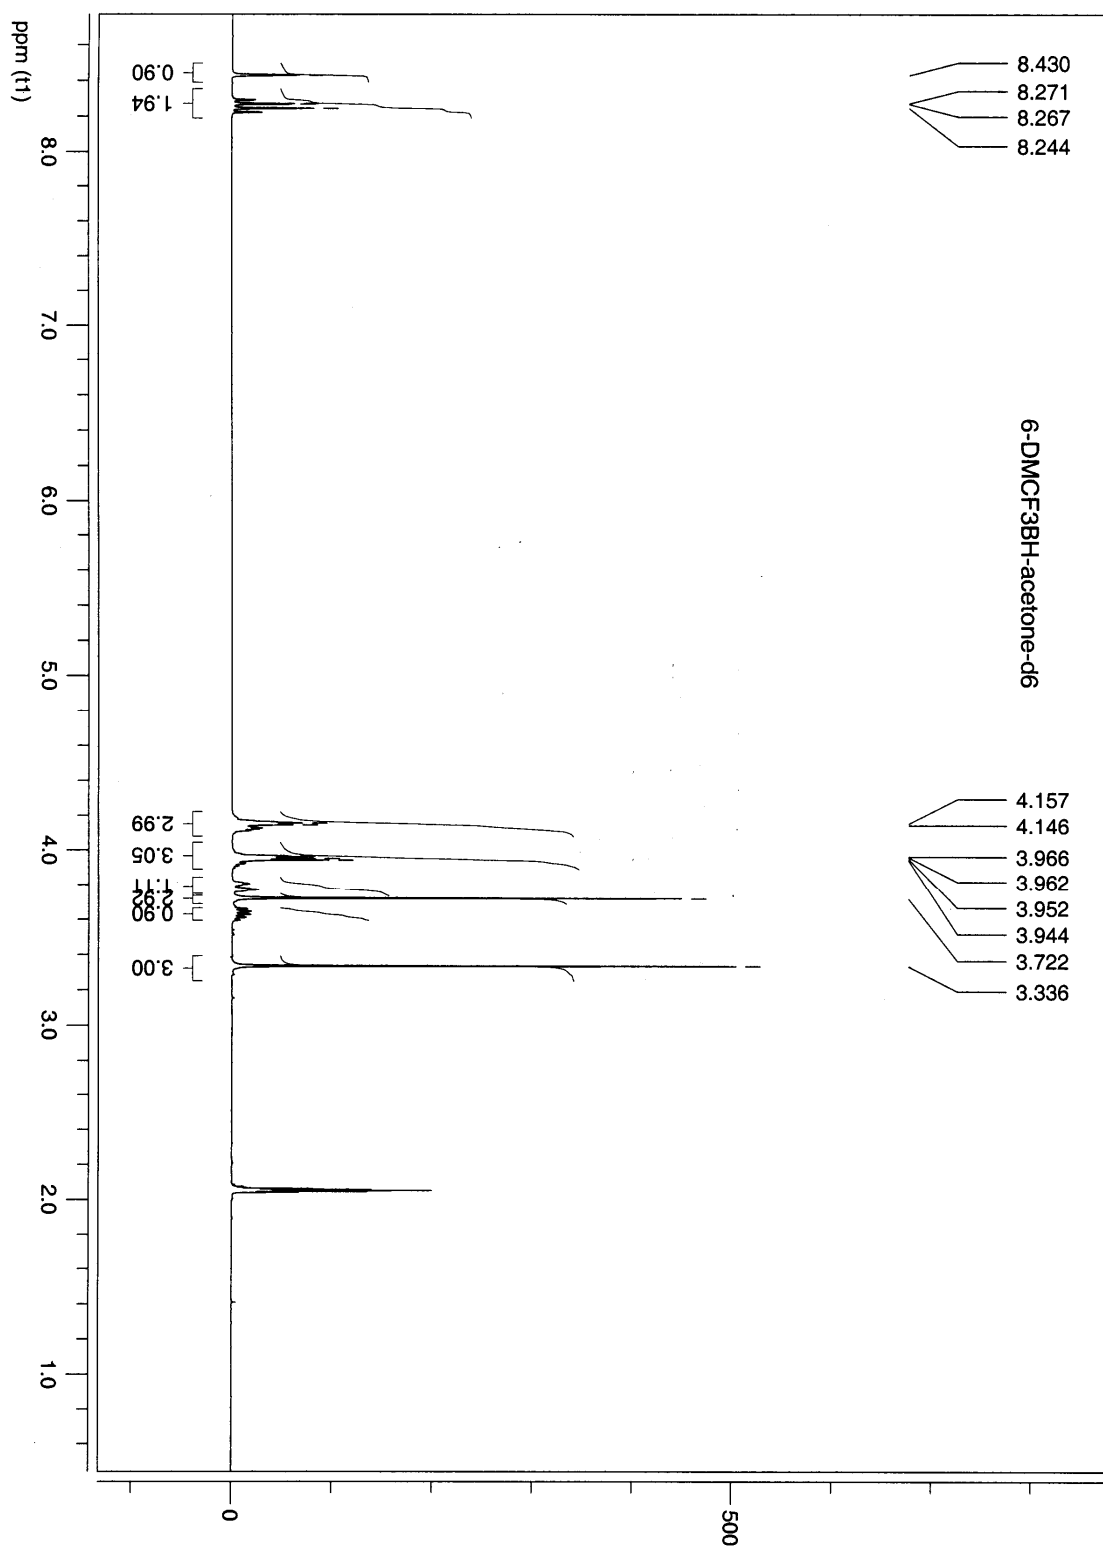

5e, <sup>1</sup>H-NMR

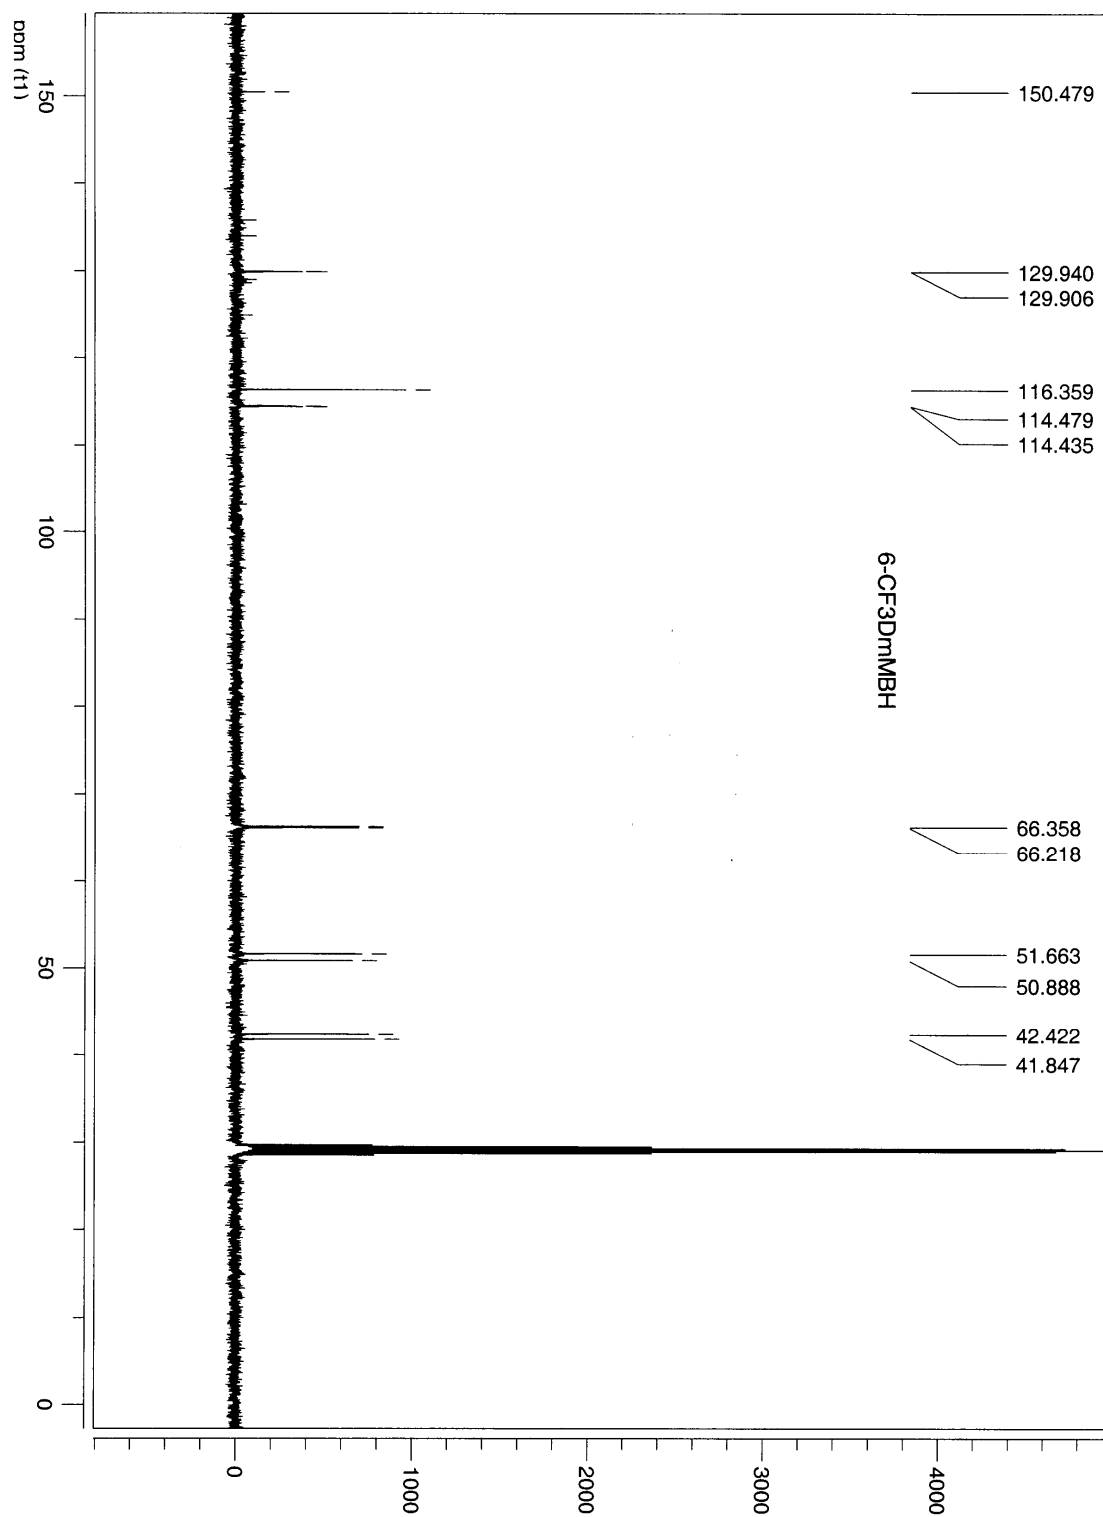

5e, C-NMR

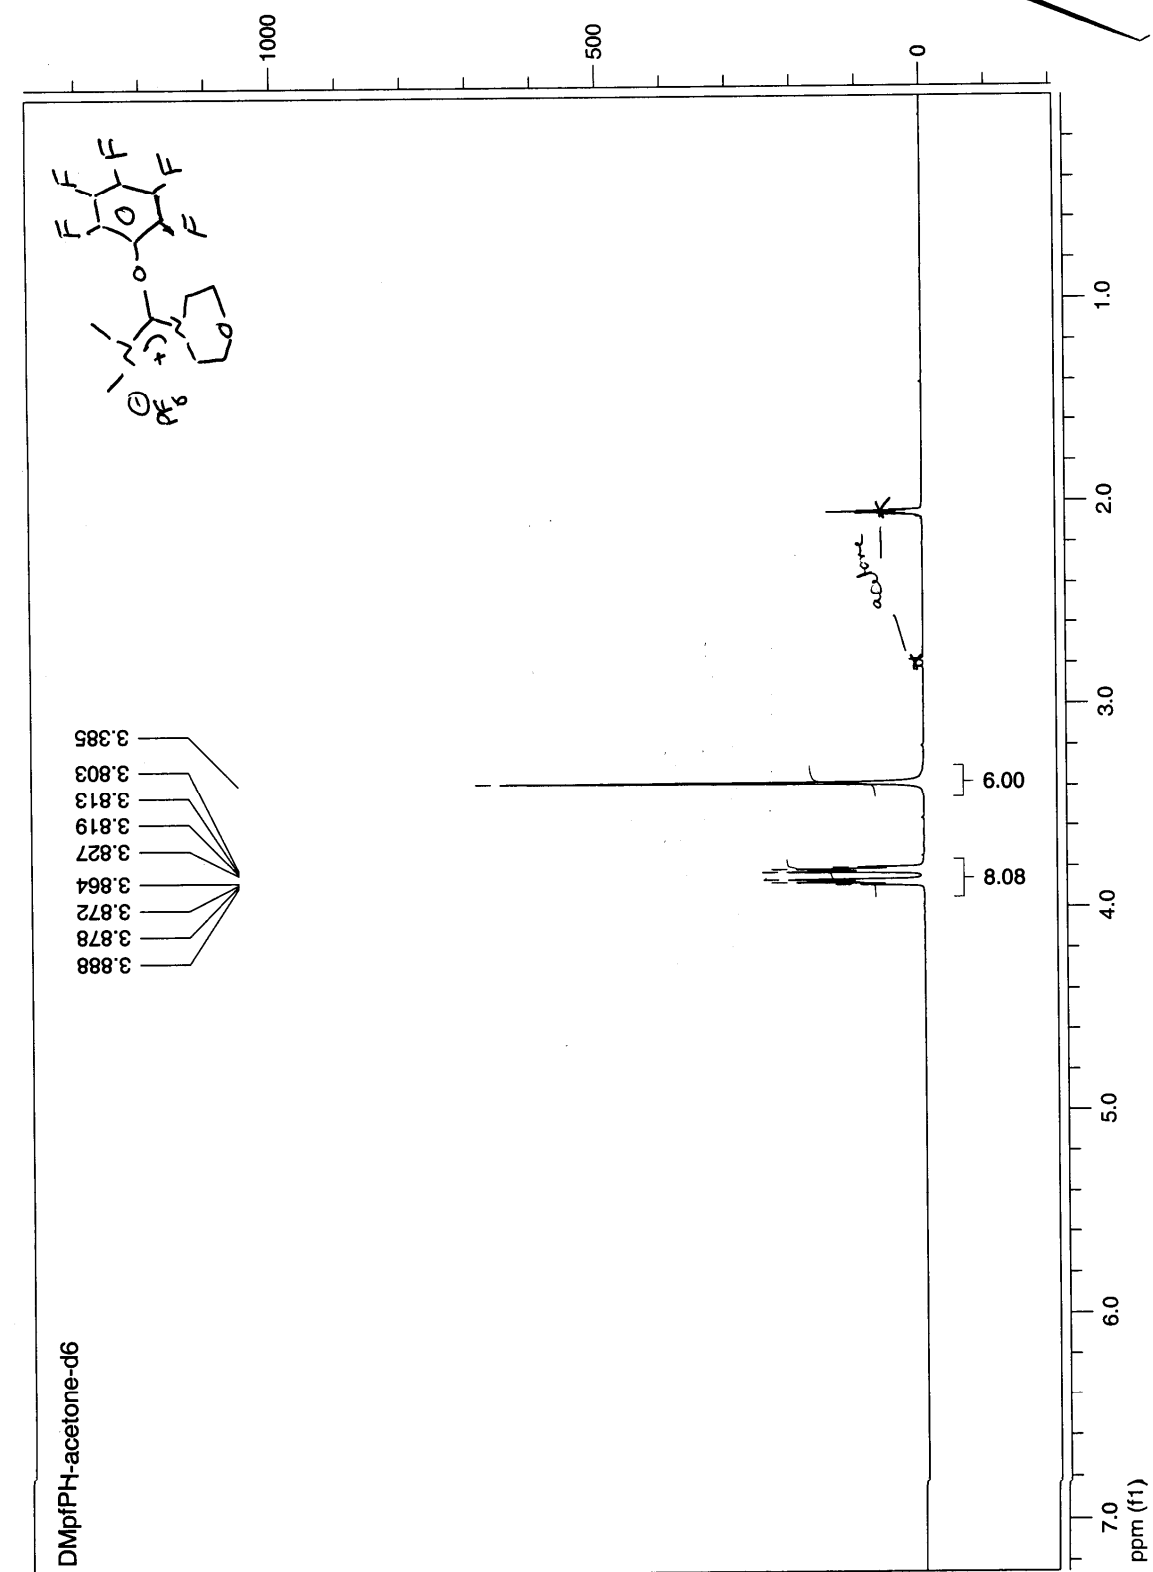

5f,  $^1\text{H}$ -NMR

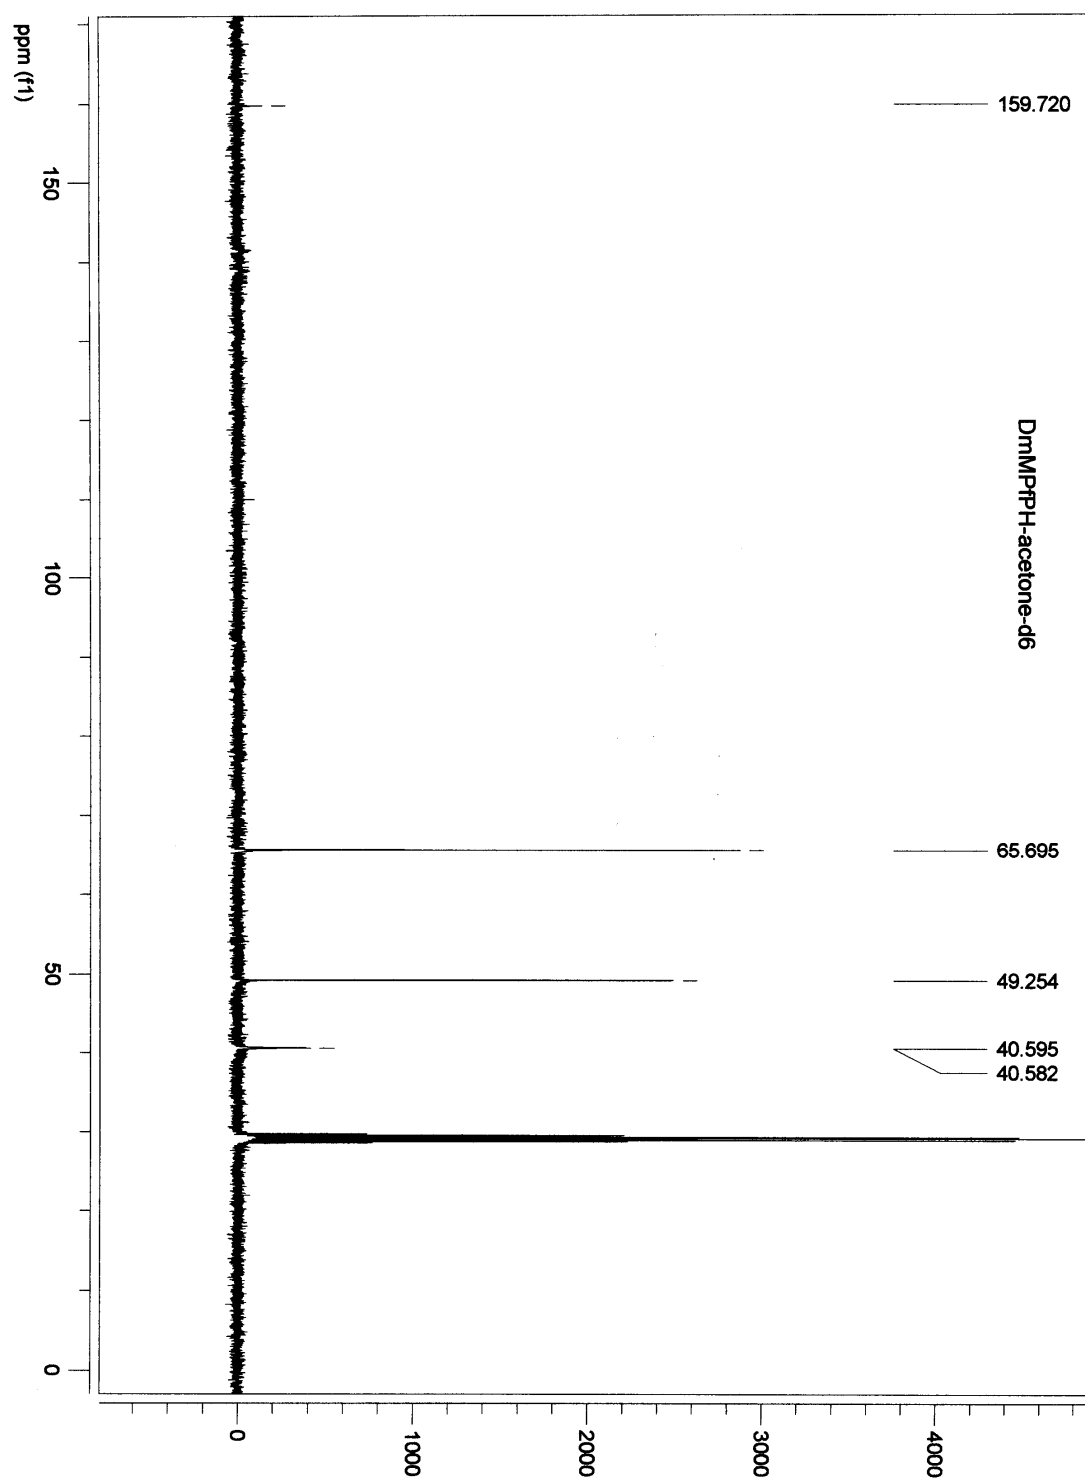

5f, C-NMR

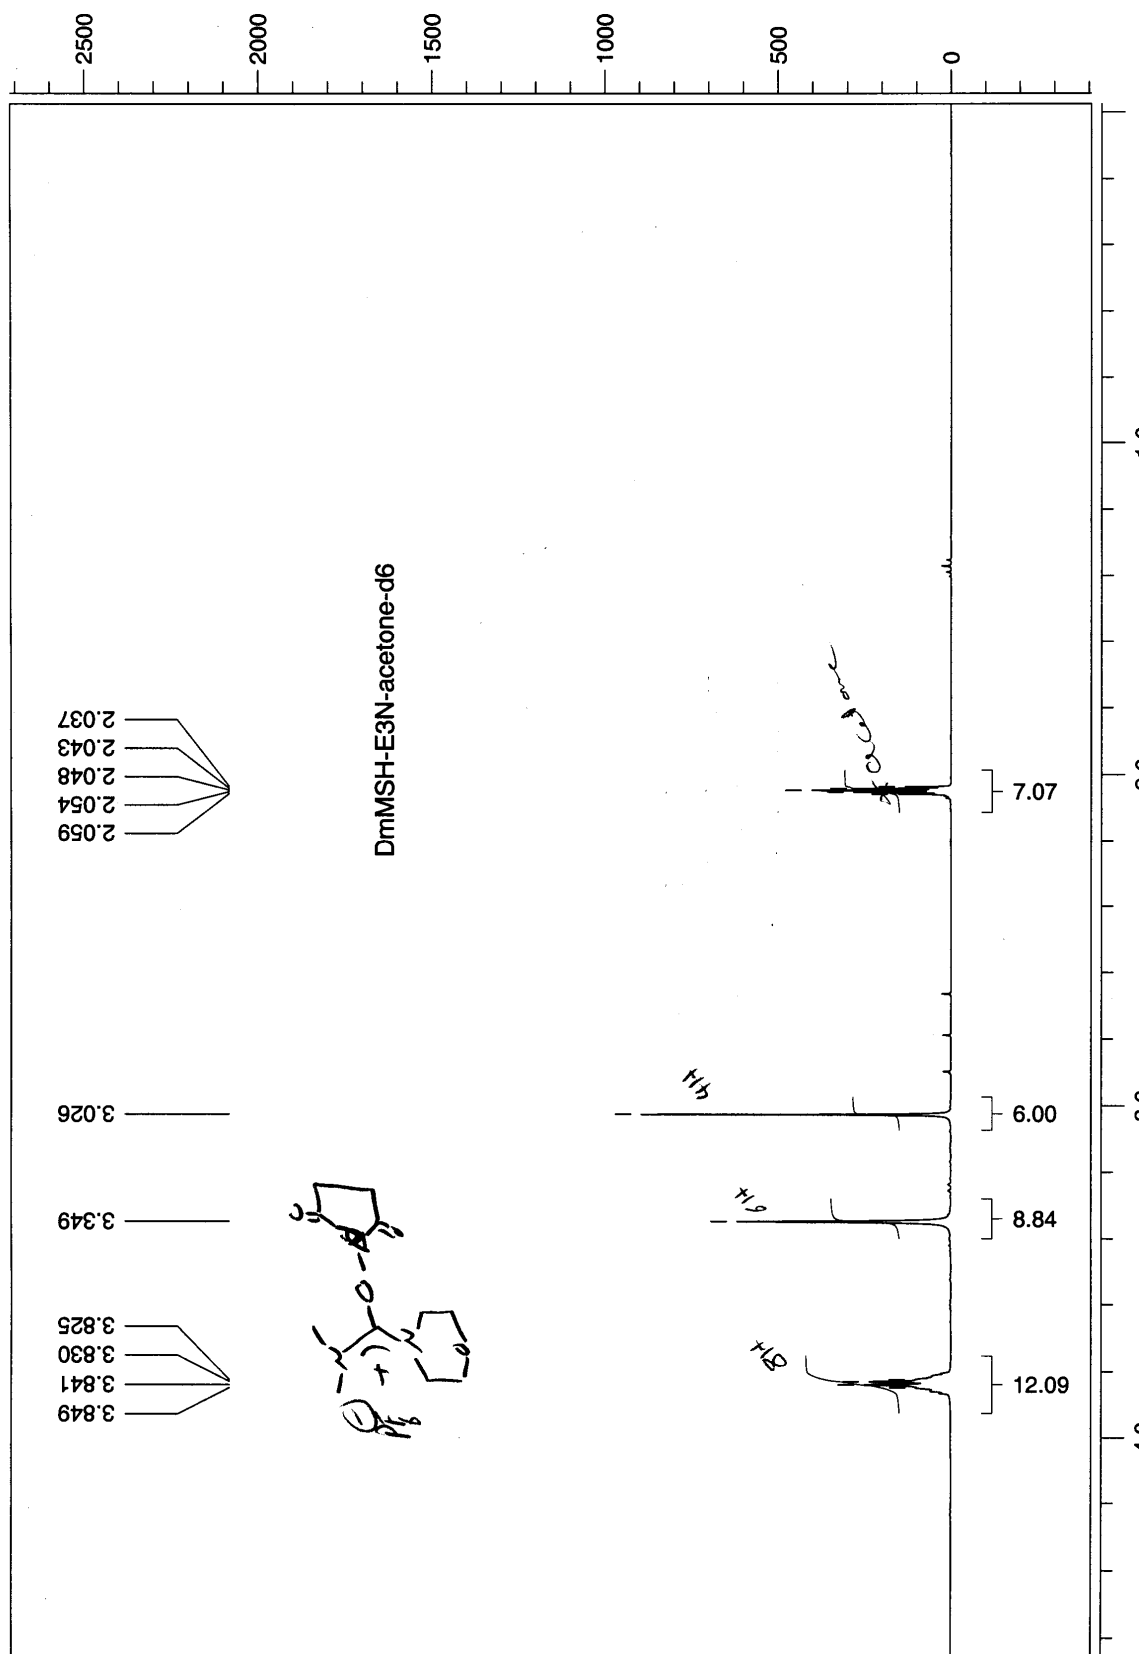

5g, H-NMR

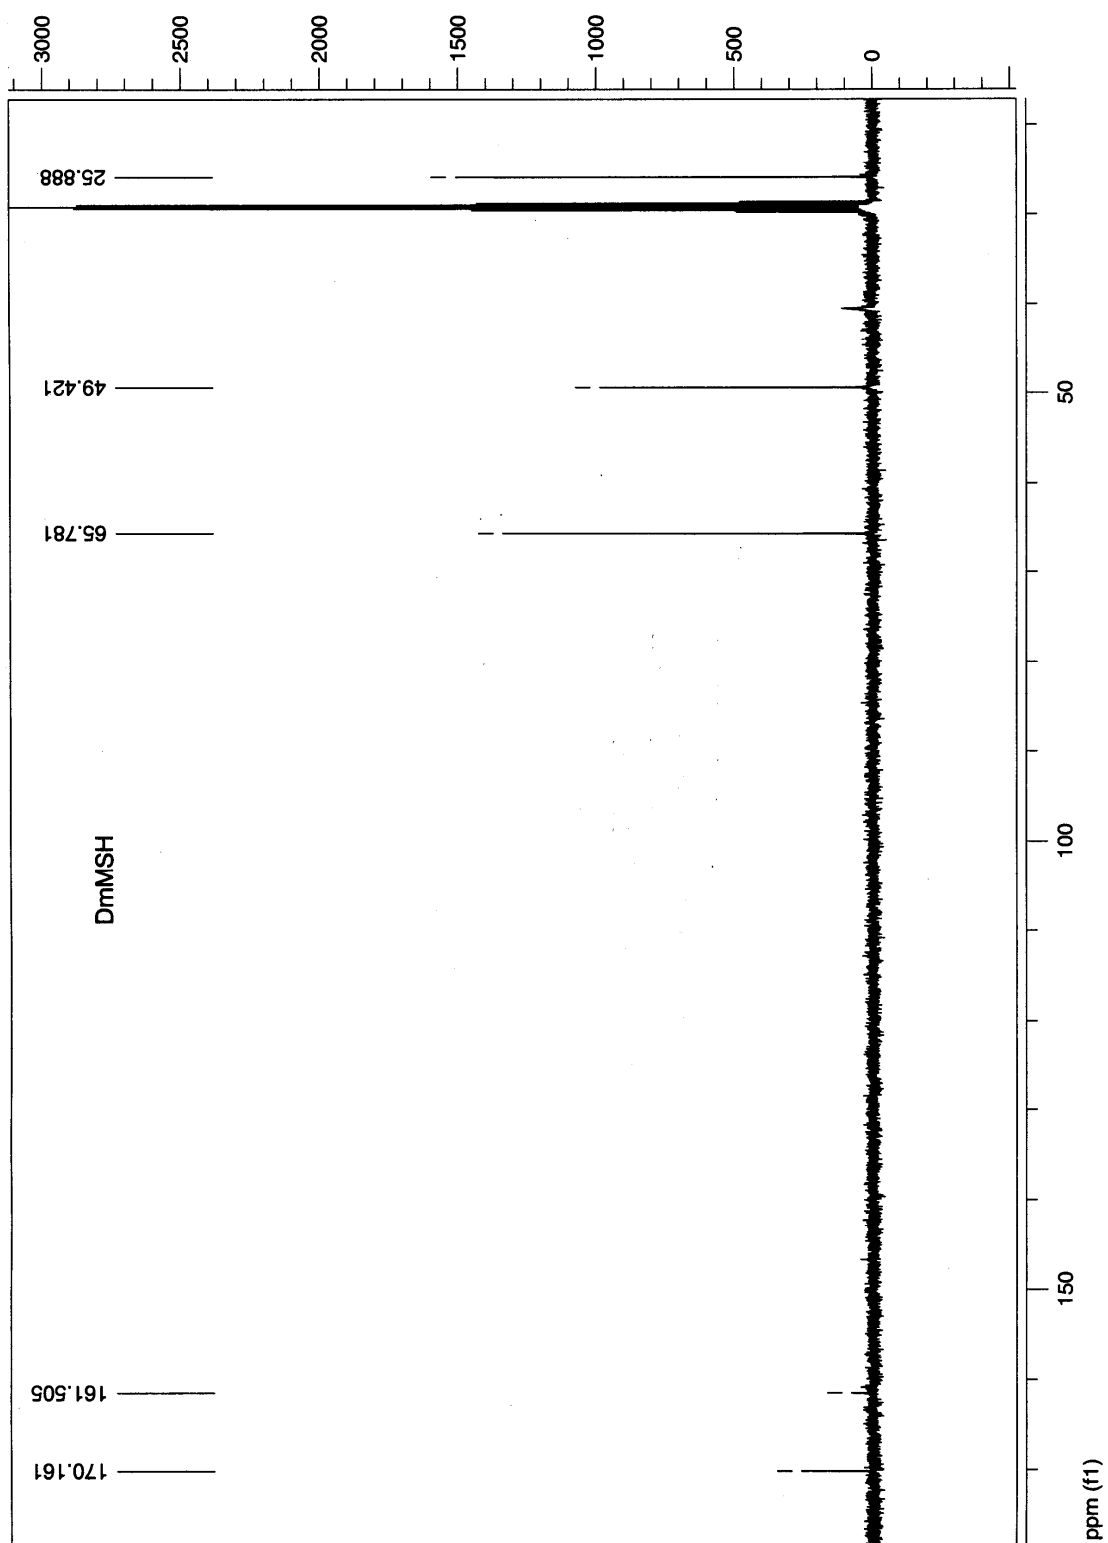

5g, C-NMR



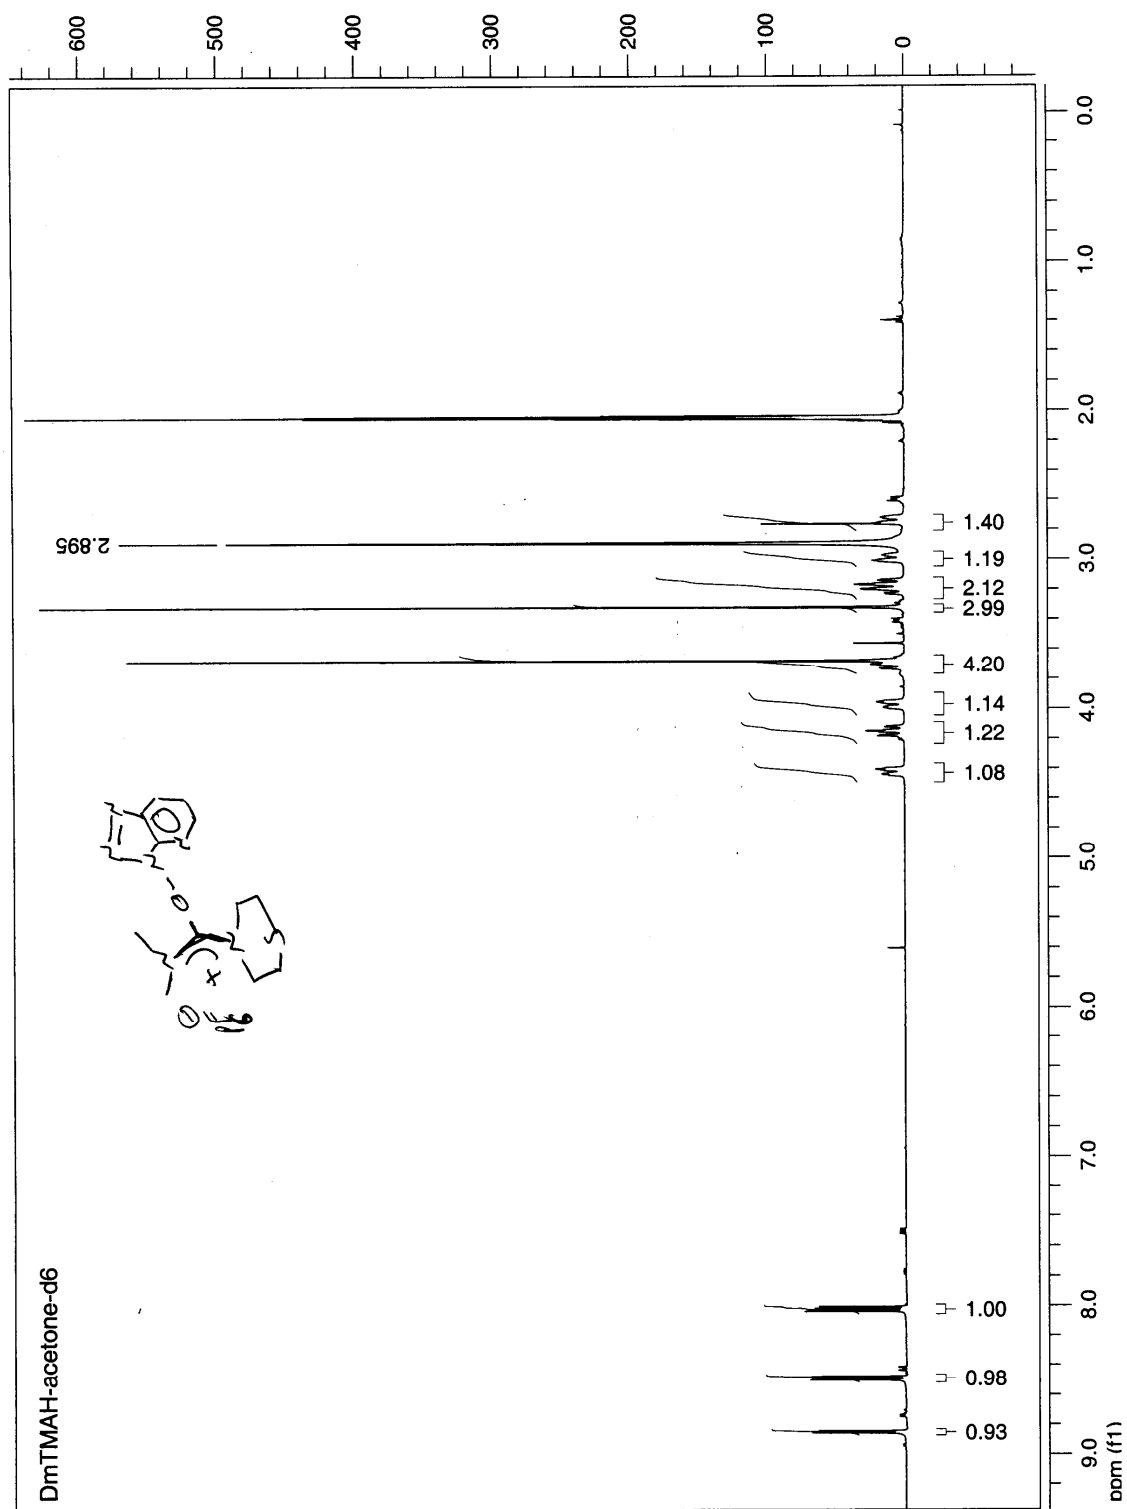

6a, <sup>1</sup>H-NMR

6a, C-NMR

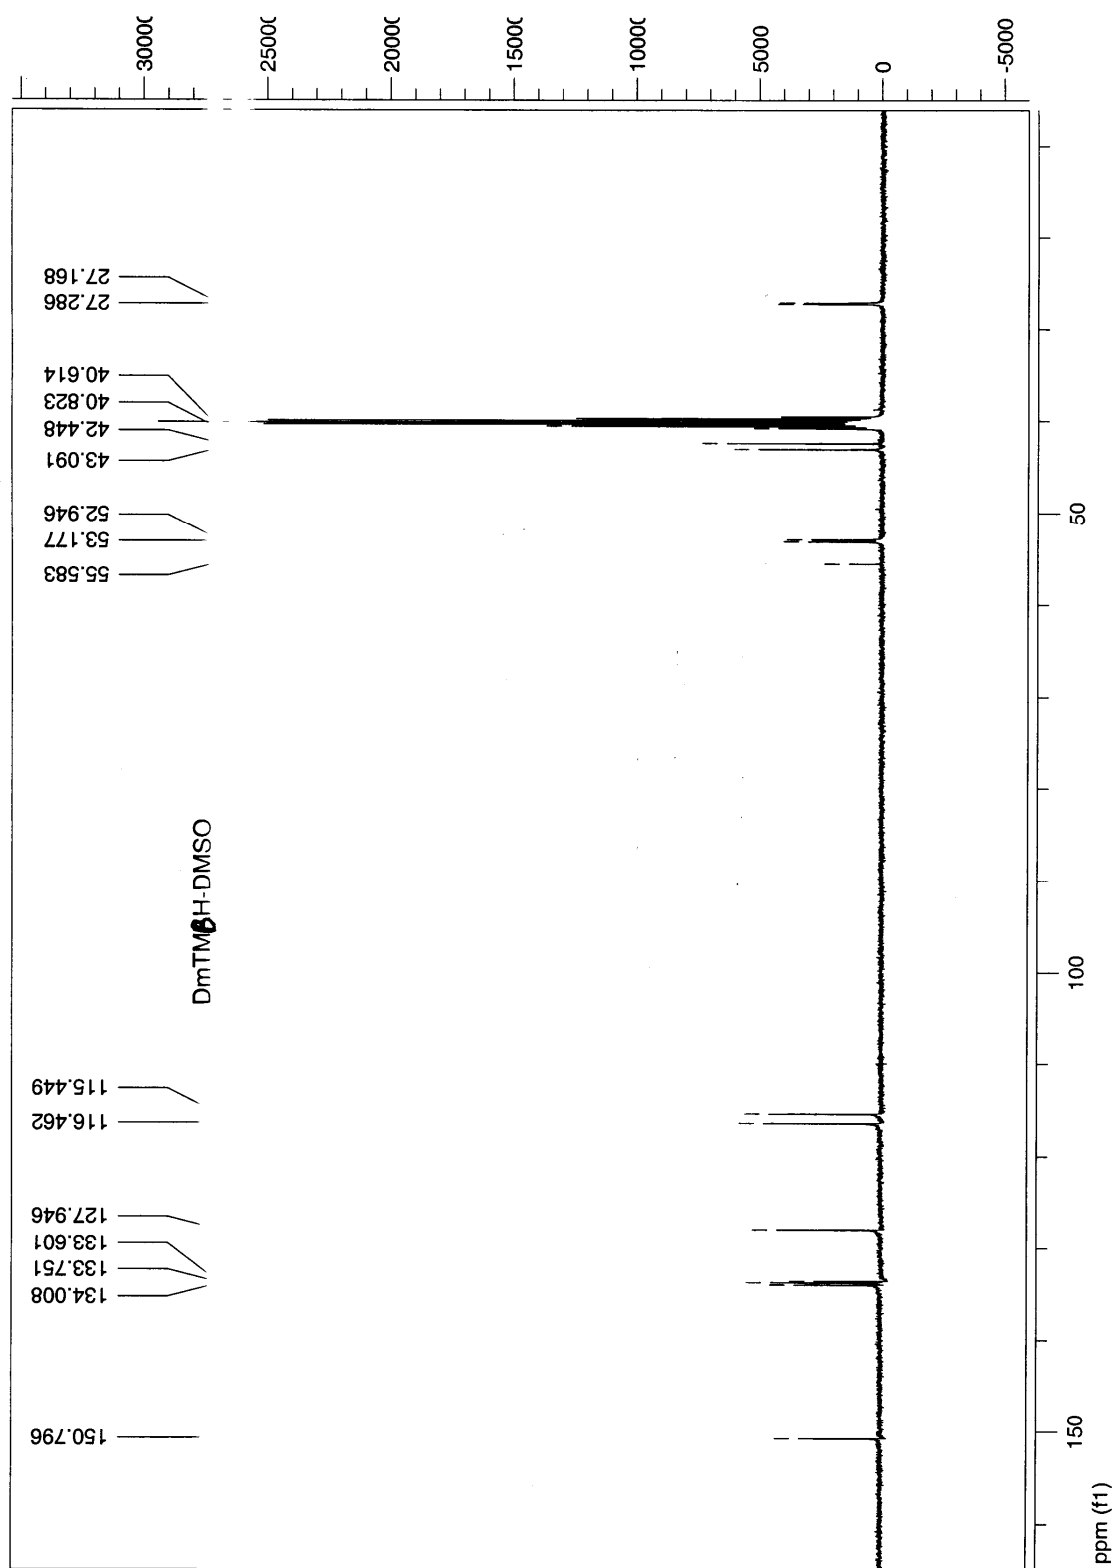

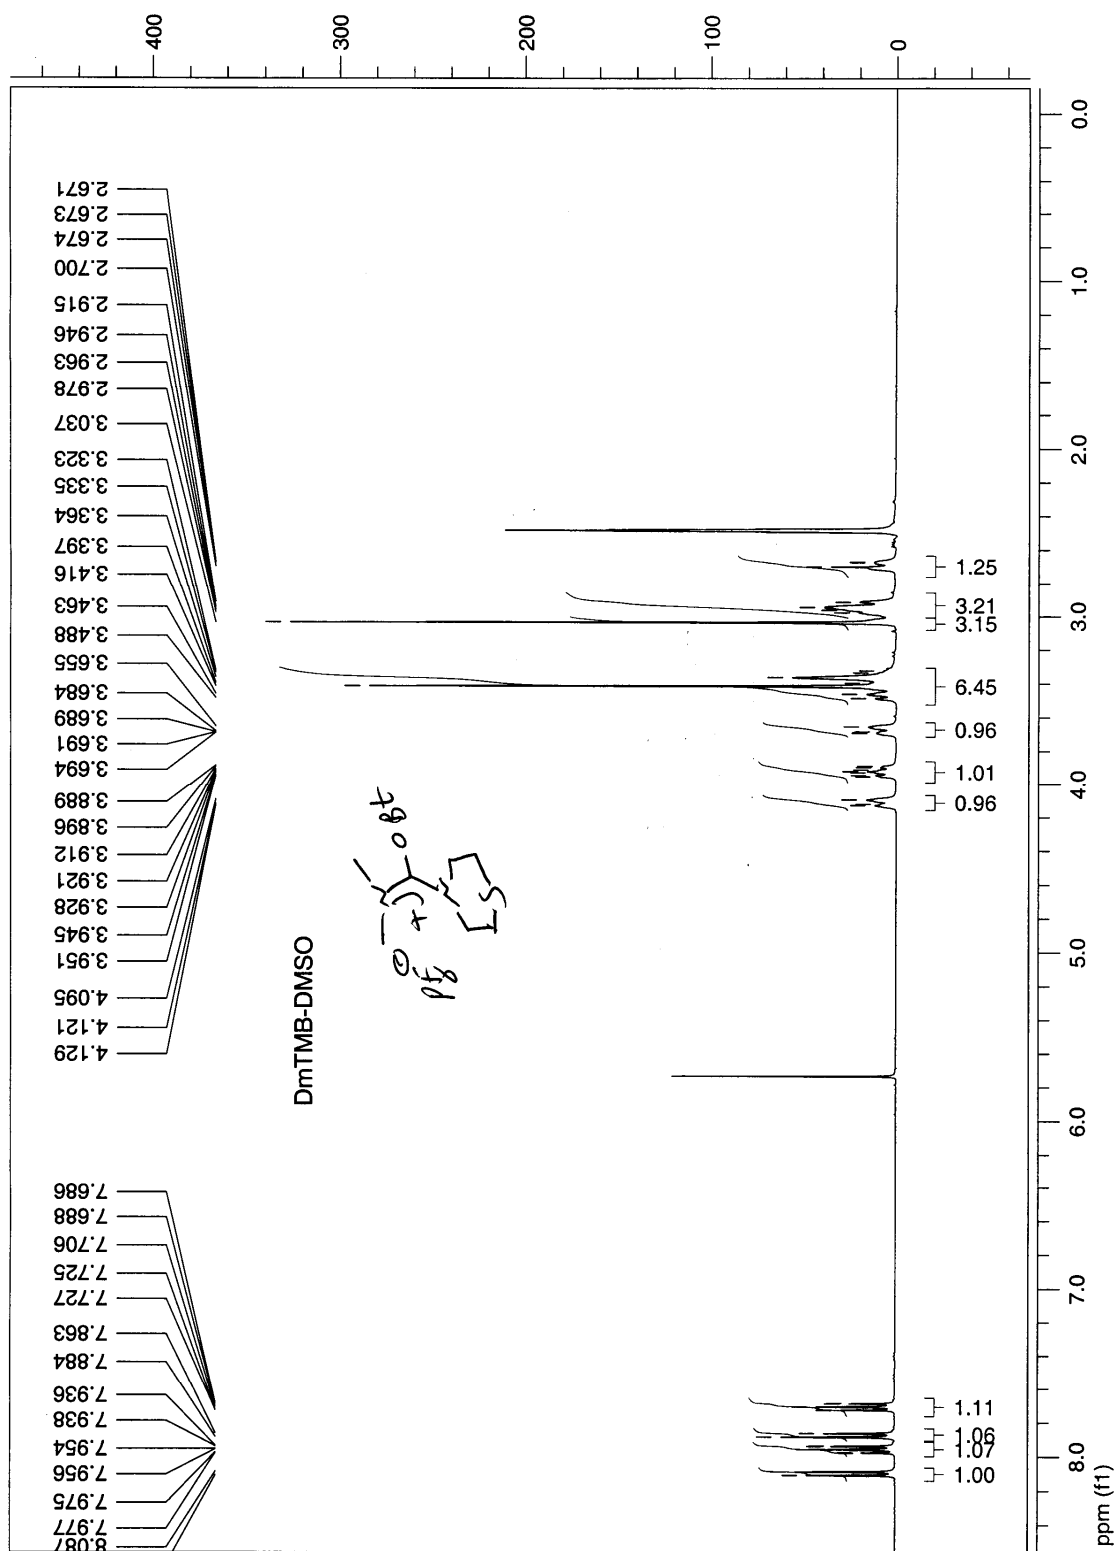

6b, C-NMR



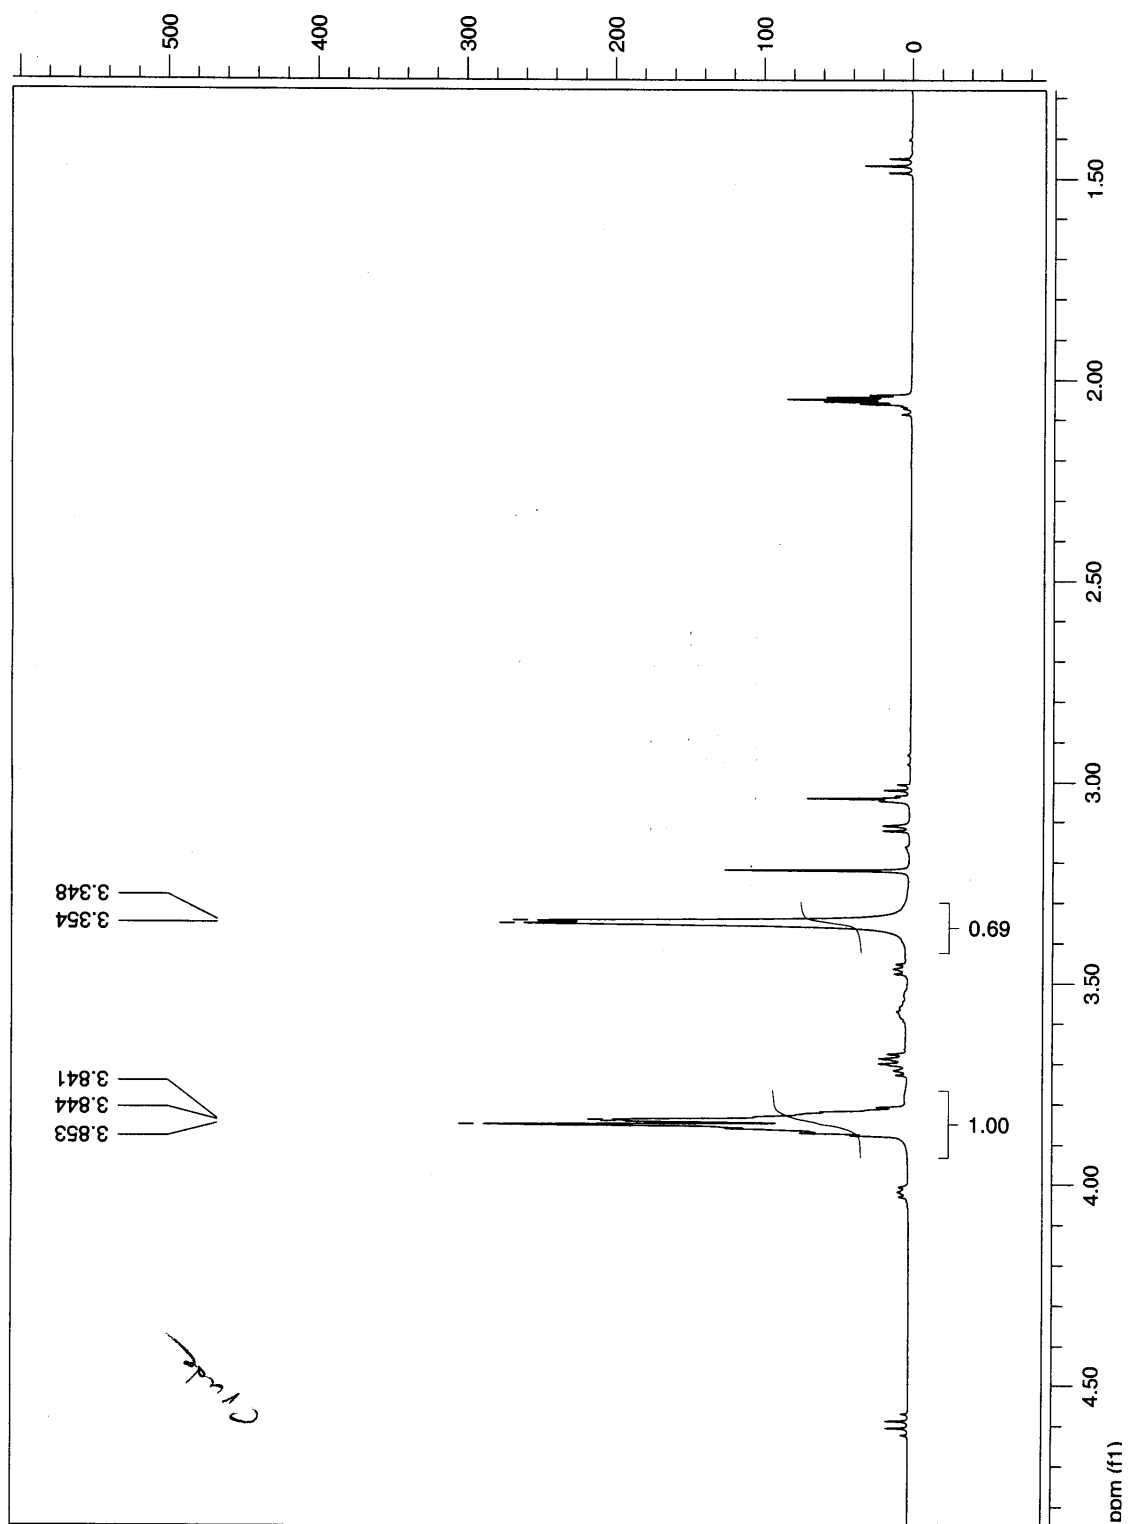

## 7, H-NMR

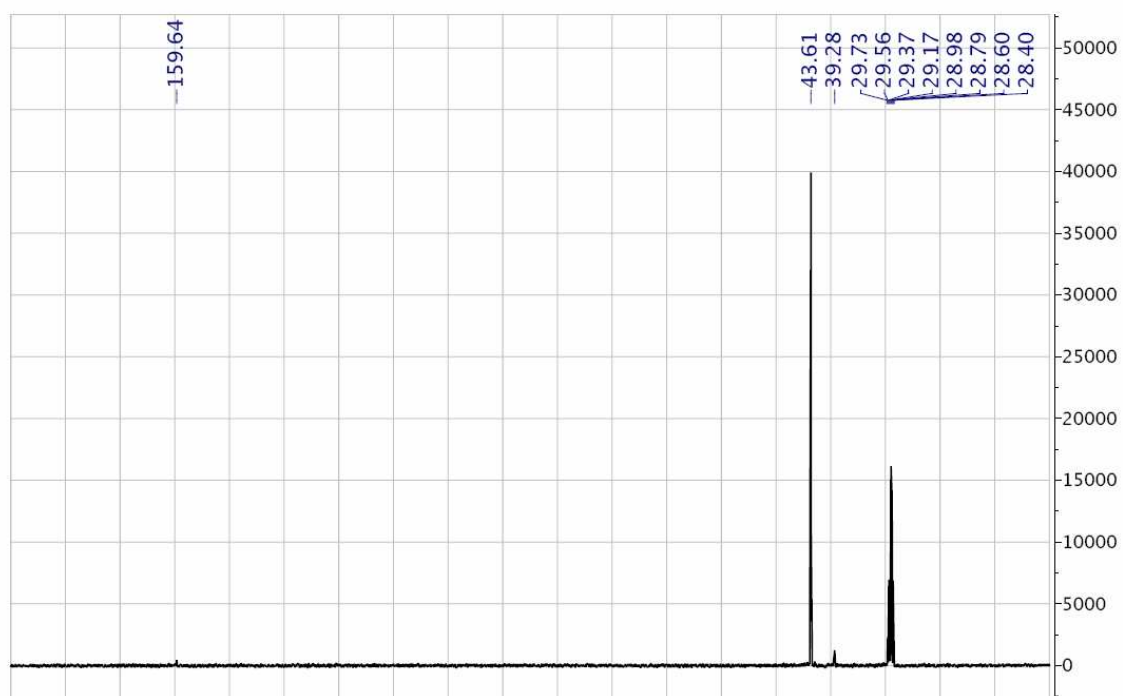

7, C-NMR

## 5a, X-ray table

PREVIEW

1

24 Aug 2006

LOUIS J. FARRUGIA

. E-mail: [louis@chem.gla.ac.uk](mailto:louis@chem.gla.ac.uk)

### Experimental

#### *Crystal data*

C<sub>12</sub>H<sub>18</sub>N<sub>6</sub>O<sub>2</sub>.F<sub>6</sub>P

$M_r = 423.29$

Monoclinic

$P2_1/c$

$a = 6.1372$  (10) Å

$b = 22.607$  (4) Å

$c = 12.0984$  (19) Å

$\beta = 102.067$  (9)°

$V = 1641.4$  (5) Å<sup>3</sup>

$Z = 4$

$D_x = 1.713$  Mg m<sup>-3</sup>

$D_m$  not measured

$\lambda = 0.71073$  Å

Mo  $K\alpha$  radiation

$\lambda = 0.7107$  Å

Cell parameters from 4304 reflections

$\theta = 3.39$ – $22.95$ °

$\mu = 0.256$  mm<sup>-1</sup>

$T = 100$  (2) K

Prism

Colourless

$0.46 \times 0.08 \times 0.06$  mm

Crystal source: synthesis as described

#### *Data collection*

BRUKER APPEX-II CCD diffractometer

Four-circle diffractometer

$\omega$  and  $\phi$  scans

Absorption correction:

multi-scan BRUKER *SADABS*

Please give reference

$T_{\min} = 0.8913$ ,  $T_{\max} = 0.9848$

23665 measured reflections

2350 independent reflections

1699 reflections with

$>2\sigma(I)$

$R_{\text{int}} = 0.1171$

$\theta_{\max} = 23.25$ °

$h = -6 \rightarrow 6$

$k = 0 \rightarrow 25$

$l = 0 \rightarrow 13$

? standard reflections

every ? reflections

intensity decay: ?%

*Refinement*Refinement on  $F^2$ 

$$R(F) = 0.0686$$

$$wR(F^2) = 0.1857$$

$$S = 0.988$$

2350 reflections

304 parameters

H-atom parameters constrained

$$w=1/[\sigma^2(F_o^2) + (0.1317P)^2 + 0.0000P]$$

$$\text{where } P = (F_o^2 + 2F_c^2)/3$$

$$(\Delta/\sigma)_{\max} = 0$$

$$\Delta\rho_{\max} = 0.432 \text{ e } \text{\AA}^{-3}$$

$$\Delta\rho_{\min} = -0.449 \text{ e } \text{\AA}^{-3}$$

Extinction correction: *SHELXL*

Extinction coefficient: 0.019 (5)

Scattering factors from *International Tables*  
for Crystallography (Vol. C)



Table 1. *Fractional atomic coordinates and equivalent isotropic displacement parameters ( $\text{\AA}^2$ )*

$$U_{\text{eq}} = (1/3)\Sigma_i\Sigma_j U^{ij} a^i a^j \mathbf{a}_i \cdot \mathbf{a}_j.$$

|      | Occupancy | $x$          | $y$          | $z$         | $U_{\text{eq}}$ |
|------|-----------|--------------|--------------|-------------|-----------------|
| N1   | 1         | 0.2637 (7)   | 0.09246 (17) | 0.6003 (3)  | 0.0232 (11)     |
| N2   | 1         | 0.4708 (7)   | 0.06605 (19) | 0.6289 (4)  | 0.0282 (11)     |
| N3   | 1         | 0.5511 (7)   | 0.06601 (17) | 0.5371 (3)  | 0.0224 (10)     |
| C4   | 1         | 0.4019 (8)   | 0.09336 (19) | 0.4461 (4)  | 0.0205 (12)     |
| N5   | 1         | 0.4406 (7)   | 0.10146 (17) | 0.3431 (4)  | 0.0286 (11)     |
| C6   | 1         | 0.2699 (9)   | 0.1294 (2)   | 0.2757 (5)  | 0.0328 (14)     |
| C7   | 1         | 0.0756 (9)   | 0.1481 (2)   | 0.3091 (5)  | 0.0321 (14)     |
| C8   | 1         | 0.0414 (9)   | 0.1387 (2)   | 0.4153 (5)  | 0.0271 (13)     |
| C9   | 1         | 0.2200 (8)   | 0.10994 (19) | 0.4881 (4)  | 0.0219 (12)     |
| O10  | 1         | 0.7403 (6)   | 0.04504 (15) | 0.5343 (3)  | 0.0315 (10)     |
| C11  | 1         | 0.1456 (8)   | 0.1058 (2)   | 0.6834 (4)  | 0.0244 (13)     |
| N12  | 1         | 0.0663 (7)   | 0.16010 (19) | 0.6844 (4)  | 0.0327 (12)     |
| C13  | 1         | -0.1297 (10) | 0.1751 (3)   | 0.7294 (6)  | 0.0523 (18)     |
| C14  | 1         | 0.1813 (11)  | 0.2119 (2)   | 0.6475 (6)  | 0.0447 (17)     |
| N15  | 1         | 0.1193 (7)   | 0.06379 (18) | 0.7556 (4)  | 0.0282 (11)     |
| C16  | 1         | 0.1229 (9)   | -0.0001 (2)  | 0.7291 (4)  | 0.0302 (13)     |
| C17  | 1         | 0.2786 (10)  | -0.0314 (3)  | 0.8245 (5)  | 0.0411 (16)     |
| O18  | 1         | 0.2159 (6)   | -0.0212 (2)  | 0.9299 (3)  | 0.0466 (12)     |
| C19  | 1         | 0.2307 (10)  | 0.0406 (3)   | 0.9557 (5)  | 0.0449 (16)     |
| C20  | 1         | 0.0726 (9)   | 0.0759 (2)   | 0.8688 (4)  | 0.0338 (14)     |
| P31A | 0.67      | 0.5454 (5)   | 0.21756 (18) | 0.9486 (3)  | 0.0360 (8)      |
| F32A | 0.67      | 0.8061 (9)   | 0.2055 (2)   | 0.9883 (5)  | 0.0447 (14)     |
| F33A | 0.67      | 0.5377 (16)  | 0.1552 (7)   | 0.8792 (10) | 0.029 (2)       |
| F34A | 0.67      | 0.5868 (9)   | 0.2502 (2)   | 0.8375 (5)  | 0.0470 (14)     |
| F35A | 0.67      | 0.2816 (14)  | 0.2297 (4)   | 0.9103 (7)  | 0.047 (2)       |
| F36A | 0.67      | 0.5003 (10)  | 0.1859 (2)   | 1.0592 (6)  | 0.0475 (15)     |
| F37A | 0.67      | 0.5736 (9)   | 0.28012 (19) | 1.0141 (4)  | 0.0484 (14)     |
| P31B | 0.33      | 0.5704 (8)   | 0.1862 (3)   | 0.9923 (6)  | 0.0242 (11)     |
| F36B | 0.33      | 0.4696 (15)  | 0.1319 (4)   | 1.0483 (7)  | 0.033 (2)       |
| F32B | 0.33      | 0.8133 (14)  | 0.1587 (4)   | 1.0239 (8)  | 0.035 (2)       |
| F37B | 0.33      | 0.6170 (17)  | 0.2199 (4)   | 1.1105 (8)  | 0.037 (2)       |
| F34B | 0.33      | 0.665 (2)    | 0.2425 (5)   | 0.9330 (11) | 0.050 (3)       |
| F35B | 0.33      | 0.329 (2)    | 0.2135 (7)   | 0.9550 (14) | 0.040 (4)       |
| F33B | 0.33      | 0.479 (5)    | 0.1547 (15)  | 0.875 (2)   | 0.029 (2)       |

Table 2. *Anisotropic displacement parameters ( $\text{\AA}^2$ )*

|          |          |          |          |          |          |
|----------|----------|----------|----------|----------|----------|
| $U_{11}$ | $U_{22}$ | $U_{33}$ | $U_{12}$ | $U_{13}$ | $U_{23}$ |
|----------|----------|----------|----------|----------|----------|

|      |           |             |             |              |              |              |
|------|-----------|-------------|-------------|--------------|--------------|--------------|
| N1   | 0.022 (3) | 0.034 (2)   | 0.010 (2)   | -0.0003 (18) | -0.0040 (19) | 0.0006 (18)  |
| N2   | 0.025 (3) | 0.045 (3)   | 0.011 (3)   | 0.001 (2)    | -0.004 (2)   | -0.001 (2)   |
| N3   | 0.019 (3) | 0.033 (2)   | 0.011 (3)   | -0.0004 (19) | -0.0061 (19) | -0.0003 (18) |
| C4   | 0.027 (3) | 0.021 (2)   | 0.010 (3)   | -0.001 (2)   | -0.006 (2)   | 0.003 (2)    |
| N5   | 0.037 (3) | 0.030 (2)   | 0.017 (3)   | -0.004 (2)   | 0.000 (2)    | 0.0034 (19)  |
| C6   | 0.044 (4) | 0.037 (3)   | 0.015 (3)   | -0.001 (3)   | -0.002 (3)   | 0.008 (2)    |
| C7   | 0.031 (3) | 0.036 (3)   | 0.024 (3)   | 0.004 (2)    | -0.008 (3)   | 0.018 (2)    |
| C8   | 0.026 (3) | 0.031 (3)   | 0.022 (3)   | 0.003 (2)    | -0.001 (2)   | 0.009 (2)    |
| C9   | 0.026 (3) | 0.021 (2)   | 0.015 (3)   | -0.002 (2)   | -0.006 (2)   | 0.001 (2)    |
| O10  | 0.026 (2) | 0.046 (2)   | 0.020 (2)   | 0.0049 (17)  | -0.0008 (17) | 0.0051 (17)  |
| C11  | 0.021 (3) | 0.038 (3)   | 0.009 (3)   | -0.008 (2)   | -0.007 (2)   | 0.000 (2)    |
| N12  | 0.038 (3) | 0.039 (3)   | 0.021 (3)   | -0.003 (2)   | 0.005 (2)    | -0.004 (2)   |
| C13  | 0.053 (4) | 0.064 (4)   | 0.045 (4)   | 0.018 (3)    | 0.022 (3)    | 0.011 (3)    |
| C14  | 0.065 (5) | 0.034 (3)   | 0.040 (4)   | -0.009 (3)   | 0.022 (3)    | -0.011 (3)   |
| N15  | 0.028 (3) | 0.042 (2)   | 0.011 (2)   | -0.006 (2)   | -0.0046 (19) | 0.000 (2)    |
| C16  | 0.034 (3) | 0.037 (3)   | 0.016 (3)   | -0.004 (2)   | -0.006 (2)   | 0.005 (2)    |
| C17  | 0.038 (4) | 0.061 (4)   | 0.021 (4)   | 0.006 (3)    | -0.001 (3)   | 0.020 (3)    |
| O18  | 0.037 (3) | 0.082 (3)   | 0.018 (2)   | 0.009 (2)    | -0.0003 (19) | 0.020 (2)    |
| C19  | 0.032 (4) | 0.080 (5)   | 0.017 (3)   | -0.002 (3)   | -0.008 (3)   | 0.006 (3)    |
| C20  | 0.028 (3) | 0.055 (3)   | 0.016 (3)   | -0.008 (3)   | -0.002 (2)   | 0.000 (3)    |
| P31A | 0.051 (2) | 0.0350 (17) | 0.0236 (17) | -0.0011 (15) | 0.0123 (14)  | -0.0039 (14) |
| F32A | 0.045 (4) | 0.052 (3)   | 0.038 (3)   | -0.005 (3)   | 0.013 (3)    | -0.014 (3)   |
| F33A | 0.017 (7) | 0.0403 (17) | 0.028 (2)   | -0.003 (4)   | 0.001 (4)    | -0.0025 (15) |
| F34A | 0.078 (4) | 0.040 (3)   | 0.027 (3)   | 0.008 (3)    | 0.023 (3)    | 0.009 (2)    |
| F35A | 0.045 (5) | 0.052 (4)   | 0.041 (6)   | 0.018 (3)    | 0.008 (4)    | -0.006 (4)   |
| F36A | 0.054 (4) | 0.063 (4)   | 0.030 (4)   | 0.009 (3)    | 0.018 (3)    | 0.013 (3)    |
| F37A | 0.070 (4) | 0.042 (3)   | 0.035 (3)   | 0.002 (2)    | 0.016 (3)    | -0.013 (2)   |
| P31B | 0.027 (3) | 0.025 (3)   | 0.019 (3)   | -0.007 (2)   | 0.000 (2)    | -0.005 (3)   |
| F36B | 0.046 (6) | 0.037 (5)   | 0.014 (5)   | -0.013 (4)   | 0.001 (4)    | -0.001 (4)   |
| F32B | 0.036 (6) | 0.045 (6)   | 0.022 (6)   | 0.001 (4)    | -0.003 (4)   | -0.005 (4)   |
| F37B | 0.041 (6) | 0.035 (5)   | 0.030 (6)   | 0.000 (5)    | -0.007 (5)   | -0.018 (5)   |
| F34B | 0.066 (9) | 0.039 (6)   | 0.041 (9)   | -0.021 (7)   | 0.002 (7)    | 0.020 (6)    |
| F35B | 0.019 (8) | 0.047 (9)   | 0.044 (11)  | 0.011 (6)    | -0.015 (7)   | -0.009 (7)   |
| F33B | 0.017 (7) | 0.0403 (17) | 0.028 (2)   | -0.003 (4)   | 0.001 (4)    | -0.0025 (15) |

Table 3. *Selected geometric parameters* ( $\text{\AA}$ ,  $^\circ$ )

|           |           |             |            |
|-----------|-----------|-------------|------------|
| N1—N2     | 1.381 (6) | N15—C16     | 1.482 (7)  |
| N1—C9     | 1.385 (6) | N15—C20     | 1.483 (7)  |
| N1—C11    | 1.390 (6) | C16—C17     | 1.511 (7)  |
| N2—N3     | 1.306 (6) | C16—H16A    | 0.99       |
| N3—O10    | 1.261 (5) | C16—H16B    | 0.99       |
| N3—C4     | 1.418 (6) | C17—O18     | 1.425 (7)  |
| C4—N5     | 1.329 (6) | C17—H17A    | 0.99       |
| C4—C9     | 1.372 (7) | C17—H17B    | 0.99       |
| N5—C6     | 1.344 (7) | O18—C19     | 1.431 (7)  |
| C6—C7     | 1.402 (8) | C19—C20     | 1.502 (8)  |
| C6—H6     | 0.95      | C19—H19A    | 0.99       |
| C7—C8     | 1.361 (7) | C19—H19B    | 0.99       |
| C7—H7     | 0.95      | C20—H20A    | 0.99       |
| C8—C9     | 1.413 (7) | C20—H20B    | 0.99       |
| C8—H8     | 0.95      | P31A—F36A   | 1.593 (6)  |
| O10—H10   | 0.84      | P31A—F32A   | 1.595 (6)  |
| C11—N12   | 1.321 (7) | P31A—F34A   | 1.600 (6)  |
| C11—N15   | 1.324 (6) | P31A—F35A   | 1.612 (8)  |
| N12—C13   | 1.460 (7) | P31A—F37A   | 1.613 (5)  |
| N12—C14   | 1.484 (7) | P31A—F33A   | 1.637 (12) |
| C13—H13A  | 0.98      | P31B—F35B   | 1.581 (13) |
| C13—H13B  | 0.98      | P31B—F33B   | 1.59 (2)   |
| C13—H13C  | 0.98      | P31B—F32B   | 1.587 (10) |
| C14—H14A  | 0.98      | P31B—F36B   | 1.588 (10) |
| C14—H14B  | 0.98      | P31B—F37B   | 1.593 (10) |
| C14—H14C  | 0.98      | P31B—F34B   | 1.628 (11) |
| N2—N1—C9  | 110.4 (4) | C7—C6—H6    | 117.7      |
| N2—N1—C11 | 120.3 (4) | C8—C7—C6    | 122.2 (5)  |
| C9—N1—C11 | 128.5 (4) | C8—C7—H7    | 118.9      |
| N3—N2—N1  | 106.1 (4) | C6—C7—H7    | 118.9      |
| O10—N3—N2 | 122.4 (4) | C7—C8—C9    | 114.1 (5)  |
| O10—N3—C4 | 126.3 (4) | C7—C8—H8    | 123        |
| N2—N3—C4  | 111.3 (4) | C9—C8—H8    | 123        |
| N5—C4—C9  | 128.9 (5) | C4—C9—N1    | 106.2 (4)  |
| N5—C4—N3  | 125.1 (4) | C4—C9—C8    | 118.7 (5)  |
| C9—C4—N3  | 106.0 (4) | N1—C9—C8    | 135.1 (5)  |
| C4—N5—C6  | 111.4 (4) | N3—O10—H10  | 109.5      |
| N5—C6—C7  | 124.7 (5) | N12—C11—N15 | 124.4 (5)  |
| N5—C6—H6  | 117.7     | N12—C11—N1  | 117.2 (4)  |

|               |           |                |            |
|---------------|-----------|----------------|------------|
| N15—C11—N1    | 118.4 (4) | H19A—C19—H19B  | 108        |
| C11—N12—C13   | 123.6 (5) | N15—C20—C19    | 109.1 (5)  |
| C11—N12—C14   | 122.1 (5) | N15—C20—H20A   | 109.9      |
| C13—N12—C14   | 114.1 (5) | C19—C20—H20A   | 109.9      |
| N12—C13—H13A  | 109.5     | N15—C20—H20B   | 109.9      |
| N12—C13—H13B  | 109.5     | C19—C20—H20B   | 109.9      |
| H13A—C13—H13B | 109.5     | H20A—C20—H20B  | 108.3      |
| N12—C13—H13C  | 109.5     | F36A—P31A—F32A | 90.5 (4)   |
| H13A—C13—H13C | 109.5     | F36A—P31A—F34A | 178.9 (4)  |
| H13B—C13—H13C | 109.5     | F32A—P31A—F34A | 90.4 (4)   |
| N12—C14—H14A  | 109.5     | F36A—P31A—F35A | 88.7 (4)   |
| N12—C14—H14B  | 109.5     | F32A—P31A—F35A | 179.2 (5)  |
| H14A—C14—H14B | 109.5     | F34A—P31A—F35A | 90.3 (4)   |
| N12—C14—H14C  | 109.5     | F36A—P31A—F37A | 90.1 (3)   |
| H14A—C14—H14C | 109.5     | F32A—P31A—F37A | 90.3 (3)   |
| H14B—C14—H14C | 109.5     | F34A—P31A—F37A | 89.3 (4)   |
| C11—N15—C16   | 123.3 (4) | F35A—P31A—F37A | 89.4 (4)   |
| C11—N15—C20   | 123.4 (4) | F36A—P31A—F33A | 93.0 (7)   |
| C16—N15—C20   | 113.3 (4) | F32A—P31A—F33A | 85.8 (4)   |
| N15—C16—C17   | 109.1 (4) | F34A—P31A—F33A | 87.7 (6)   |
| N15—C16—H16A  | 109.9     | F35A—P31A—F33A | 94.6 (5)   |
| C17—C16—H16A  | 109.9     | F37A—P31A—F33A | 175.0 (5)  |
| N15—C16—H16B  | 109.9     | F35B—P31B—F33B | 77.7 (12)  |
| C17—C16—H16B  | 109.9     | F35B—P31B—F32B | 177.4 (9)  |
| H16A—C16—H16B | 108.3     | F33B—P31B—F32B | 100.2 (12) |
| O18—C17—C16   | 111.2 (5) | F35B—P31B—F36B | 89.9 (7)   |
| O18—C17—H17A  | 109.4     | F33B—P31B—F36B | 86.6 (13)  |
| C16—C17—H17A  | 109.4     | F32B—P31B—F36B | 91.4 (6)   |
| O18—C17—H17B  | 109.4     | F35B—P31B—F37B | 92.9 (8)   |
| C16—C17—H17B  | 109.4     | F33B—P31B—F37B | 170.0 (12) |
| H17A—C17—H17B | 108       | F32B—P31B—F37B | 89.3 (5)   |
| C17—O18—C19   | 109.7 (4) | F36B—P31B—F37B | 90.0 (7)   |
| O18—C19—C20   | 111.4 (5) | F35B—P31B—F34B | 88.2 (8)   |
| O18—C19—H19A  | 109.4     | F33B—P31B—F34B | 92.6 (14)  |
| C20—C19—H19A  | 109.4     | F32B—P31B—F34B | 90.4 (6)   |
| O18—C19—H19B  | 109.4     | F36B—P31B—F34B | 178.1 (7)  |
| C20—C19—H19B  | 109.4     | F37B—P31B—F34B | 90.5 (6)   |

|              |            |                 |            |
|--------------|------------|-----------------|------------|
| C9—N1—N2—N3  | −1.2 (5)   | C7—C8—C9—N1     | 178.5 (5)  |
| C11—N1—N2—N3 | −172.1 (4) | N2—N1—C11—N12   | 129.7 (5)  |
| N1—N2—N3—O10 | 179.7 (4)  | C9—N1—C11—N12   | −39.4 (7)  |
| N1—N2—N3—C4  | 1.2 (5)    | N2—N1—C11—N15   | −50.6 (6)  |
| O10—N3—C4—N5 | −0.5 (7)   | C9—N1—C11—N15   | 140.4 (5)  |
| N2—N3—C4—N5  | 177.9 (4)  | N15—C11—N12—C13 | −26.5 (8)  |
| O10—N3—C4—C9 | −179.1 (4) | N1—C11—N12—C13  | 153.3 (5)  |
| N2—N3—C4—C9  | −0.7 (5)   | N15—C11—N12—C14 | 148.6 (5)  |
| C9—C4—N5—C6  | −0.8 (7)   | N1—C11—N12—C14  | −31.6 (7)  |
| N3—C4—N5—C6  | −179.1 (4) | N12—C11—N15—C16 | 154.0 (5)  |
| C4—N5—C6—C7  | 0.4 (7)    | N1—C11—N15—C16  | −25.7 (7)  |
| N5—C6—C7—C8  | −0.9 (8)   | N12—C11—N15—C20 | −22.9 (8)  |
| C6—C7—C8—C9  | 1.4 (7)    | N1—C11—N15—C20  | 157.3 (4)  |
| N5—C4—C9—N1  | −178.6 (5) | C11—N15—C16—C17 | 130.8 (5)  |
| N3—C4—C9—N1  | −0.1 (5)   | C20—N15—C16—C17 | −52.0 (6)  |
| N5—C4—C9—C8  | 1.5 (7)    | N15—C16—C17—O18 | 56.3 (6)   |
| N3—C4—C9—C8  | −180.0 (4) | C16—C17—O18—C19 | −62.1 (6)  |
| N2—N1—C9—C4  | 0.8 (5)    | C17—O18—C19—C20 | 62.4 (6)   |
| C11—N1—C9—C4 | 170.7 (4)  | C11—N15—C20—C19 | −130.6 (5) |
| N2—N1—C9—C8  | −179.3 (5) | C16—N15—C20—C19 | 52.1 (6)   |
| C11—N1—C9—C8 | −9.4 (8)   | O18—C19—C20—N15 | −56.5 (6)  |
| C7—C8—C9—C4  | −1.6 (6)   |                 |            |

## 5b, X-ray Table

PREVIEW

1

21 Aug 2006

LOUIS J. FARRUGIA

. E-mail: [louis@chem.gla.ac.uk](mailto:louis@chem.gla.ac.uk)

### Experimental

#### *Crystal data*

C<sub>13</sub>H<sub>18</sub>N<sub>5</sub>O<sub>2</sub>.F<sub>6</sub>P

$M_r = 421.29$

Monoclinic

$P2_1/c$

$a = 6.12000$  (10) Å

$b = 23.9910$  (5) Å

$c = 11.7260$  (3) Å

$\beta = 103.4190$  (10)°

$V = 1674.67$  (6) Å<sup>3</sup>

$Z = 4$

$D_x = 1.671$  Mg m<sup>-3</sup>

$D_m$  not measured

$\lambda = 0.71073$  Å

Mo  $K\alpha$  radiation

$\lambda = 0.7107$  Å

Cell parameters from 4248 reflections

$\theta = 3.11$ – $28.93^\circ$

$\mu = 0.249$  mm<sup>-1</sup>

$T = 100$  (2) K

Prism

Colourless

$0.42 \times 0.14 \times 0.04$  mm

Crystal source: synthesis as described

#### *Data collection*

BRUKER APPEX-II CCD diffractometer

Four-circle diffractometer

$\omega$  and  $\phi$  scans

Absorption correction:

multi-scan BRUKER *SADABS*

Please give reference

$T_{\min} = 0.9026$ ,  $T_{\max} = 0.9901$

4945 measured reflections

4660 independent reflections

3363 reflections with

$>2\sigma(I)$

$R_{\text{int}} = 0.0438$

$\theta_{\max} = 30.13^\circ$

$h = -8 \rightarrow 8$

$k = 0 \rightarrow 29$

$l = 0 \rightarrow 16$

? standard reflections

every ? reflections

intensity decay: ?%

*Refinement*Refinement on  $F^2$ 

$$R(F) = 0.0412$$

$$wR(F^2) = 0.0978$$

$$S = 1.065$$

4945 reflections

247 parameters

H-atom parameters constrained

$$w=1/[\sigma^2(F_o^2) + (0.0472P)^2 + 0.2196P]$$

$$\text{where } P = (F_o^2 + 2F_c^2)/3$$

$$(\Delta/\sigma)_{\max} = 0.001$$

$$\Delta\rho_{\max} = 0.349 \text{ e } \text{\AA}^{-3}$$

$$\Delta\rho_{\min} = -0.406 \text{ e } \text{\AA}^{-3}$$

Extinction correction: *SHELXL*

Extinction coefficient: 0.0005 (5)

Scattering factors from *International Tables*  
for Crystallography (Vol. C)

Table 1. *Fractional atomic coordinates and equivalent isotropic displacement parameters ( $\text{\AA}^2$ )*

$$U_{\text{eq}} = (1/3)\Sigma_i\Sigma_j U^{ij} a^i a^j \mathbf{a}_i \cdot \mathbf{a}_j.$$

|     | $x$          | $y$          | $z$          | $U_{\text{eq}}$ |
|-----|--------------|--------------|--------------|-----------------|
| N1  | 0.7273 (2)   | 0.09800 (6)  | 0.60240 (11) | 0.0121 (3)      |
| N2  | 0.9301 (2)   | 0.07005 (6)  | 0.62712 (12) | 0.0139 (3)      |
| N3  | 1.0005 (2)   | 0.07268 (6)  | 0.52963 (12) | 0.0133 (3)      |
| C4  | 0.8498 (2)   | 0.10157 (7)  | 0.44029 (14) | 0.0130 (3)      |
| C5  | 0.8600 (3)   | 0.11409 (7)  | 0.32590 (14) | 0.0163 (4)      |
| C6  | 0.6809 (3)   | 0.14395 (8)  | 0.26113 (14) | 0.0171 (4)      |
| C7  | 0.5003 (3)   | 0.16043 (8)  | 0.30954 (14) | 0.0167 (4)      |
| C8  | 0.4917 (2)   | 0.14787 (7)  | 0.42301 (14) | 0.0149 (3)      |
| C9  | 0.6735 (2)   | 0.11791 (7)  | 0.48843 (13) | 0.0127 (3)      |
| O10 | 1.18668 (18) | 0.05196 (5)  | 0.52057 (11) | 0.0195 (3)      |
| C11 | 0.6132 (2)   | 0.10739 (7)  | 0.69103 (13) | 0.0113 (3)      |
| N12 | 0.5357 (2)   | 0.15831 (6)  | 0.69835 (11) | 0.0119 (3)      |
| C13 | 0.6497 (3)   | 0.20863 (7)  | 0.67022 (15) | 0.0168 (4)      |
| C14 | 0.3376 (3)   | 0.16904 (8)  | 0.74555 (15) | 0.0171 (4)      |
| N15 | 0.5886 (2)   | 0.06529 (6)  | 0.75927 (11) | 0.0115 (3)      |
| C16 | 0.5805 (3)   | 0.00642 (7)  | 0.72264 (14) | 0.0152 (3)      |
| C17 | 0.7455 (3)   | -0.02729 (8) | 0.81346 (15) | 0.0165 (3)      |
| O18 | 0.70399 (19) | -0.02066 (5) | 0.92685 (10) | 0.0176 (3)      |
| C19 | 0.7322 (3)   | 0.03647 (7)  | 0.96123 (14) | 0.0162 (4)      |
| C20 | 0.5621 (3)   | 0.07326 (7)  | 0.88057 (13) | 0.0132 (3)      |
| P30 | 1.02931 (7)  | 0.19145 (2)  | 0.99909 (4)  | 0.01580 (11)    |
| F31 | 1.06681 (18) | 0.22767 (5)  | 1.11713 (10) | 0.0319 (3)      |
| F32 | 0.98752 (17) | 0.13784 (5)  | 1.07223 (9)  | 0.0247 (2)      |
| F33 | 1.29154 (15) | 0.17737 (5)  | 1.02706 (9)  | 0.0280 (3)      |
| F34 | 0.76599 (16) | 0.20526 (5)  | 0.97114 (10) | 0.0270 (3)      |
| F35 | 1.0722 (2)   | 0.24478 (5)  | 0.92649 (12) | 0.0425 (3)      |
| F36 | 0.98941 (15) | 0.15416 (5)  | 0.88218 (8)  | 0.0229 (2)      |

Table 2. *Anisotropic displacement parameters ( $\text{\AA}^2$ )*

|    | $U_{11}$   | $U_{22}$    | $U_{33}$   | $U_{12}$    | $U_{13}$   | $U_{23}$    |
|----|------------|-------------|------------|-------------|------------|-------------|
| N1 | 0.0113 (5) | 0.0147 (8)  | 0.0106 (6) | 0.0030 (5)  | 0.0036 (5) | 0.0032 (5)  |
| N2 | 0.0119 (6) | 0.0149 (8)  | 0.0150 (6) | 0.0028 (5)  | 0.0033 (5) | -0.0001 (5) |
| N3 | 0.0120 (6) | 0.0132 (8)  | 0.0152 (6) | 0.0010 (5)  | 0.0044 (5) | -0.0010 (5) |
| C4 | 0.0122 (6) | 0.0123 (9)  | 0.0145 (7) | -0.0015 (6) | 0.0032 (6) | -0.0010 (6) |
| C5 | 0.0170 (7) | 0.0189 (11) | 0.0150 (8) | -0.0036 (6) | 0.0079 (6) | -0.0022 (6) |
| C6 | 0.0212 (8) | 0.0190 (11) | 0.0120 (7) | -0.0042 (7) | 0.0058 (6) | 0.0002 (6)  |
| C7 | 0.0172 (7) | 0.0173 (10) | 0.0143 (7) | -0.0013 (6) | 0.0011 (6) | 0.0021 (6)  |



|     |              |             |            |               |              |               |
|-----|--------------|-------------|------------|---------------|--------------|---------------|
| C8  | 0.0126 (7)   | 0.0171 (10) | 0.0151 (7) | 0.0001 (6)    | 0.0034 (6)   | 0.0008 (6)    |
| C9  | 0.0138 (7)   | 0.0137 (10) | 0.0110 (7) | -0.0021 (6)   | 0.0036 (6)   | 0.0006 (6)    |
| O10 | 0.0128 (5)   | 0.0241 (8)  | 0.0233 (6) | 0.0056 (5)    | 0.0074 (5)   | -0.0005 (5)   |
| C11 | 0.0089 (6)   | 0.0151 (10) | 0.0098 (7) | -0.0008 (6)   | 0.0020 (5)   | 0.0001 (6)    |
| N12 | 0.0125 (6)   | 0.0114 (8)  | 0.0127 (6) | 0.0007 (5)    | 0.0044 (5)   | 0.0010 (5)    |
| C13 | 0.0205 (8)   | 0.0110 (10) | 0.0194 (8) | -0.0015 (6)   | 0.0057 (6)   | 0.0019 (7)    |
| C14 | 0.0137 (7)   | 0.0178 (10) | 0.0215 (8) | 0.0043 (6)    | 0.0079 (6)   | 0.0024 (7)    |
| N15 | 0.0146 (6)   | 0.0088 (8)  | 0.0111 (6) | -0.0004 (5)   | 0.0032 (5)   | 0.0002 (5)    |
| C16 | 0.0193 (8)   | 0.0105 (10) | 0.0158 (7) | -0.0017 (6)   | 0.0038 (6)   | -0.0005 (6)   |
| C17 | 0.0183 (7)   | 0.0123 (10) | 0.0197 (8) | 0.0015 (6)    | 0.0063 (6)   | 0.0013 (7)    |
| O18 | 0.0210 (6)   | 0.0138 (7)  | 0.0190 (6) | 0.0008 (5)    | 0.0067 (5)   | 0.0042 (5)    |
| C19 | 0.0174 (7)   | 0.0179 (11) | 0.0134 (7) | 0.0016 (6)    | 0.0037 (6)   | 0.0034 (6)    |
| C20 | 0.0170 (7)   | 0.0132 (10) | 0.0108 (7) | 0.0004 (6)    | 0.0057 (6)   | 0.0010 (6)    |
| P30 | 0.01194 (18) | 0.0182 (3)  | 0.0166 (2) | -0.00174 (16) | 0.00211 (15) | -0.00217 (18) |
| F31 | 0.0260 (5)   | 0.0313 (7)  | 0.0343 (6) | 0.0011 (5)    | -0.0010 (5)  | -0.0207 (5)   |
| F32 | 0.0333 (6)   | 0.0235 (7)  | 0.0194 (5) | -0.0021 (5)   | 0.0105 (4)   | 0.0006 (4)    |
| F33 | 0.0121 (4)   | 0.0479 (8)  | 0.0225 (5) | 0.0015 (4)    | 0.0013 (4)   | -0.0048 (5)   |
| F34 | 0.0149 (4)   | 0.0332 (7)  | 0.0309 (6) | 0.0047 (4)    | 0.0013 (4)   | -0.0093 (5)   |
| F35 | 0.0412 (7)   | 0.0313 (8)  | 0.0510 (8) | -0.0121 (6)   | 0.0028 (6)   | 0.0176 (6)    |
| F36 | 0.0175 (4)   | 0.0377 (7)  | 0.0140 (5) | -0.0014 (4)   | 0.0047 (4)   | -0.0057 (4)   |

Table 3. *Selected geometric parameters* ( $\text{\AA}$ ,  $^\circ$ )

|           |             |              |             |
|-----------|-------------|--------------|-------------|
| N1—N2     | 1.3811 (17) | C14—H14A     | 0.98        |
| N1—C9     | 1.3850 (19) | C14—H14B     | 0.98        |
| N1—C11    | 1.3982 (19) | C14—H14C     | 0.98        |
| N2—N3     | 1.3137 (18) | N15—C16      | 1.474 (2)   |
| N3—O10    | 1.2697 (16) | N15—C20      | 1.4809 (19) |
| N3—C4     | 1.407 (2)   | C16—C17      | 1.519 (2)   |
| C4—C9     | 1.385 (2)   | C16—H16A     | 0.99        |
| C4—C5     | 1.390 (2)   | C16—H16B     | 0.99        |
| C5—C6     | 1.380 (2)   | C17—O18      | 1.419 (2)   |
| C5—H5     | 0.95        | C17—H17A     | 0.99        |
| C6—C7     | 1.411 (2)   | C17—H17B     | 0.99        |
| C6—H6     | 0.95        | O18—C19      | 1.428 (2)   |
| C7—C8     | 1.377 (2)   | C19—C20      | 1.517 (2)   |
| C7—H7     | 0.95        | C19—H19A     | 0.99        |
| C8—C9     | 1.395 (2)   | C19—H19B     | 0.99        |
| C8—H8     | 0.95        | C20—H20A     | 0.99        |
| C11—N15   | 1.319 (2)   | C20—H20B     | 0.99        |
| C11—N12   | 1.320 (2)   | P30—F35      | 1.5919 (13) |
| N12—C14   | 1.4677 (19) | P30—F33      | 1.5978 (10) |
| N12—C13   | 1.469 (2)   | P30—F32      | 1.5990 (12) |
| C13—H13A  | 0.98        | P30—F34      | 1.6028 (10) |
| C13—H13B  | 0.98        | P30—F31      | 1.6049 (12) |
| C13—H13C  | 0.98        | P30—F36      | 1.6075 (11) |
| N2—N1—C9  | 111.76 (12) | C8—C7—C6     | 122.46 (15) |
| N2—N1—C11 | 120.11 (12) | C8—C7—H7     | 118.8       |
| C9—N1—C11 | 127.87 (13) | C6—C7—H7     | 118.8       |
| N3—N2—N1  | 104.74 (12) | C7—C8—C9     | 116.06 (15) |
| O10—N3—N2 | 122.42 (13) | C7—C8—H8     | 122         |
| O10—N3—C4 | 125.19 (13) | C9—C8—H8     | 122         |
| N2—N3—C4  | 112.38 (12) | N1—C9—C4     | 105.22 (13) |
| C9—C4—C5  | 123.06 (15) | N1—C9—C8     | 133.52 (15) |
| C9—C4—N3  | 105.90 (14) | C4—C9—C8     | 121.26 (15) |
| C5—C4—N3  | 131.03 (14) | N15—C11—N12  | 125.16 (14) |
| C6—C5—C4  | 115.81 (15) | N15—C11—N1   | 118.33 (14) |
| C6—C5—H5  | 122.1       | N12—C11—N1   | 116.51 (14) |
| C4—C5—H5  | 122.1       | C11—N12—C14  | 121.82 (14) |
| C5—C6—C7  | 121.34 (15) | C11—N12—C13  | 123.31 (13) |
| C5—C6—H6  | 119.3       | C14—N12—C13  | 114.66 (13) |
| C7—C6—H6  | 119.3       | N12—C13—H13A | 109.5       |

|               |             |               |             |
|---------------|-------------|---------------|-------------|
| N12—C13—H13B  | 109.5       | O18—C19—C20   | 111.22 (13) |
| H13A—C13—H13B | 109.5       | O18—C19—H19A  | 109.4       |
| N12—C13—H13C  | 109.5       | C20—C19—H19A  | 109.4       |
| H13A—C13—H13C | 109.5       | O18—C19—H19B  | 109.4       |
| H13B—C13—H13C | 109.5       | C20—C19—H19B  | 109.4       |
| N12—C14—H14A  | 109.5       | H19A—C19—H19B | 108         |
| N12—C14—H14B  | 109.5       | N15—C20—C19   | 108.14 (13) |
| H14A—C14—H14B | 109.5       | N15—C20—H20A  | 110.1       |
| N12—C14—H14C  | 109.5       | C19—C20—H20A  | 110.1       |
| H14A—C14—H14C | 109.5       | N15—C20—H20B  | 110.1       |
| H14B—C14—H14C | 109.5       | C19—C20—H20B  | 110.1       |
| C11—N15—C16   | 123.92 (13) | H20A—C20—H20B | 108.4       |
| C11—N15—C20   | 122.50 (14) | F35—P30—F33   | 89.84 (7)   |
| C16—N15—C20   | 113.58 (13) | F35—P30—F32   | 179.72 (7)  |
| N15—C16—C17   | 109.52 (13) | F33—P30—F32   | 89.88 (6)   |
| N15—C16—H16A  | 109.8       | F35—P30—F34   | 90.42 (7)   |
| C17—C16—H16A  | 109.8       | F33—P30—F34   | 179.72 (7)  |
| N15—C16—H16B  | 109.8       | F32—P30—F34   | 89.86 (6)   |
| C17—C16—H16B  | 109.8       | F35—P30—F31   | 91.02 (7)   |
| H16A—C16—H16B | 108.2       | F33—P30—F31   | 90.09 (6)   |
| O18—C17—C16   | 111.27 (13) | F32—P30—F31   | 88.94 (6)   |
| O18—C17—H17A  | 109.4       | F34—P30—F31   | 90.01 (6)   |
| C16—C17—H17A  | 109.4       | F35—P30—F36   | 90.14 (7)   |
| O18—C17—H17B  | 109.4       | F33—P30—F36   | 90.22 (6)   |
| C16—C17—H17B  | 109.4       | F32—P30—F36   | 89.90 (6)   |
| H17A—C17—H17B | 108         | F34—P30—F36   | 89.67 (6)   |
| C17—O18—C19   | 109.62 (13) | F31—P30—F36   | 178.80 (7)  |

|              |              |                 |              |
|--------------|--------------|-----------------|--------------|
| C9—N1—N2—N3  | −0.01 (17)   | C7—C8—C9—C4     | −0.7 (2)     |
| C11—N1—N2—N3 | −174.54 (14) | N2—N1—C11—N15   | −47.6 (2)    |
| N1—N2—N3—O10 | 178.63 (14)  | C9—N1—C11—N15   | 138.86 (16)  |
| N1—N2—N3—C4  | −0.12 (17)   | N2—N1—C11—N12   | 133.26 (15)  |
| O10—N3—C4—C9 | −178.51 (15) | C9—N1—C11—N12   | −40.3 (2)    |
| N2—N3—C4—C9  | 0.20 (19)    | N15—C11—N12—C14 | −27.0 (2)    |
| O10—N3—C4—C5 | 0.7 (3)      | N1—C11—N12—C14  | 152.08 (14)  |
| N2—N3—C4—C5  | 179.42 (17)  | N15—C11—N12—C13 | 147.49 (15)  |
| C9—C4—C5—C6  | −0.4 (3)     | N1—C11—N12—C13  | −33.4 (2)    |
| N3—C4—C5—C6  | −179.52 (17) | N12—C11—N15—C16 | 151.47 (15)  |
| C4—C5—C6—C7  | 0.1 (3)      | N1—C11—N15—C16  | −27.6 (2)    |
| C5—C6—C7—C8  | 0.0 (3)      | N12—C11—N15—C20 | −27.4 (2)    |
| C6—C7—C8—C9  | 0.3 (3)      | N1—C11—N15—C20  | 153.55 (13)  |
| N2—N1—C9—C4  | 0.13 (18)    | C11—N15—C16—C17 | 129.33 (15)  |
| C11—N1—C9—C4 | 174.13 (15)  | C20—N15—C16—C17 | −51.73 (17)  |
| N2—N1—C9—C8  | 179.85 (18)  | N15—C16—C17—O18 | 55.26 (18)   |
| C11—N1—C9—C8 | −6.1 (3)     | C16—C17—O18—C19 | −61.57 (16)  |
| C5—C4—C9—N1  | −179.49 (15) | C17—O18—C19—C20 | 63.31 (16)   |
| N3—C4—C9—N1  | −0.19 (18)   | C11—N15—C20—C19 | −128.42 (15) |
| C5—C4—C9—C8  | 0.7 (3)      | C16—N15—C20—C19 | 52.62 (16)   |
| N3—C4—C9—C8  | −179.95 (15) | O18—C19—C20—N15 | −57.59 (16)  |
| C7—C8—C9—N1  | 179.65 (18)  |                 |              |
